# Supplementary material
Source: PubMed Central journal article supplement (PMC3940392)

**Supporting Information**  
**Total Syntheses of (-)-Pyrimidoblamic Acid and P-3A**

Adam S. Duerfeldt and Dale L. Boger\*

*Department of Chemistry and the Skaggs Institute for Chemical Biology, The Scripps Research Institute, 10550 North Torrey Pines Road, La Jolla, California 92037, United States*

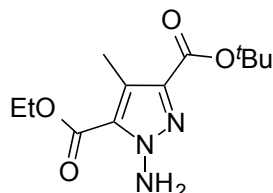

**3-(*tert*-Butyl) 5-Ethyl 1-Amino-4-methyl-1*H*-pyrazole-3,5-dicarboxylate (9a).** A solution of potassium *t*-butoxide (1 M in NMP, 17 mL) was added to a solution of **8a** (15.3 mmol, 3.9 g) in NMP (20 mL) at 20 °C. After 30 min, a solution of *O*-4-nitrobenzoylhydroxylamine (17.6 mmol, 3.2 g) in NMP (15 mL) was added at < 25 °C. The mixture was stirred at 20 °C for 45 min, at which time LC/MS analysis showed complete conversion of **8a**. The reaction mixture was quenched with addition of 7% aqueous NaCl and the aqueous layer was extracted with EtOAc. The organic layers were combined, washed with saturated aqueous NaHCO<sub>3</sub>, H<sub>2</sub>O, and saturated aqueous NaCl before being dried over Na<sub>2</sub>SO<sub>4</sub>, filtered, and concentrated in vacuo. The residue was purified by flash chromatography (SiO<sub>2</sub>, 20% EtOAc–hexanes) to yield **9a** as a ~2:1 mixture of N-amination regioisomers (3.01 g, 73%). Isomer A: <sup>1</sup>H NMR (CDCl<sub>3</sub>, 400 MHz) δ 6.68 (s, 2H), 4.38 (q, *J* = 7.1 Hz, 2H), 2.50 (s, 3H), 1.61 (s, 9H), 1.39 (t, *J* = 7.1 Hz, 3H); <sup>13</sup>C NMR (CDCl<sub>3</sub>, 100 MHz) δ 162.4, 160.3, 135.2, 126.6, 125.0, 83.9, 60.9, 28.4 (3C), 14.5, 10.5. Isomer B: <sup>1</sup>H NMR (CDCl<sub>3</sub>, 400 MHz) δ 6.58 (s, 2H), 4.41 (q, *J* = 7.1 Hz, 2H), 2.50 (s, 3H), 1.60 (s, 9H), 1.42 (t, *J* = 7.1 Hz, 3H); <sup>13</sup>C NMR (CDCl<sub>3</sub>, 100 MHz) δ 161.7, 161.1, 136.8, 125.9, 124.8, 81.9, 61.7, 28.4 (3C), 14.3, 10.6; IR for mixture (film) ν<sub>max</sub> 3334, 3235, 2979, 2934, 1709, 1582, 1446, 1369, 1298, 1243, 1168, 1131, 1092, 1017, 842, 786 cm<sup>-1</sup>; HRESI-TOF *m/z* 270.1445 (C<sub>12</sub>H<sub>19</sub>N<sub>3</sub>O<sub>4</sub> + H<sup>+</sup> requires 270.1448).

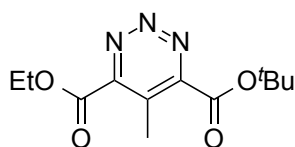

**4-(*tert*-Butyl) 6-Ethyl 5-Methyl-1,2,3-triazine-4,6-dicarboxylate (5a).** A 20% aqueous solution of KHCO<sub>3</sub> (5 mL) was added dropwise at 25 °C to a solution of **9a** (0.74 mmol, 200 mg) in CH<sub>2</sub>Cl<sub>2</sub> (3.5 mL). A solution of iodine (1.11 mmol, 283 mg) in CH<sub>2</sub>Cl<sub>2</sub> (10 mL) was added to the emulsion at 25 °C. After complete addition, the reaction mixture was allowed to stir at ambient temperature and monitored by TLC. After 5 h, the reaction was quenched with addition of 10% aqueous sodium thiosulfate. The aqueous layer was extracted with CH<sub>2</sub>Cl<sub>2</sub>. The combined organic layers were dried over Na<sub>2</sub>SO<sub>4</sub>, filtered, and concentrated in vacuo. The resulting residue was purified by flash chromatography (SiO<sub>2</sub>, 15% EtOAc–hexanes) to yield **5a** as an orange oil (149 mg, 75%): <sup>1</sup>H NMR (CDCl<sub>3</sub>, 400 MHz) δ 4.55 (q, *J* = 7.1 Hz, 2H), 2.62 (s,

3H), 1.67 (s, 9H), 1.47 (t,  $J = 7.1$  Hz, 3H);  $^{13}\text{C}$  NMR ( $\text{CDCl}_3$ , 100 MHz)  $\delta$  163.3, 162.4, 153.9, 152.0, 126.7, 85.9, 63.4, 28.2 (3C), 14.2, 14.1; IR (film)  $\nu_{\text{max}}$  2981, 2937, 1732, 1459, 1371, 1296, 1248, 1178, 1148, 1101, 1050, 1015, 841, 815, 744, 716  $\text{cm}^{-1}$ ; HRESI-TOF  $m/z$  268.1298 ( $\text{C}_{12}\text{H}_{17}\text{N}_3\text{O}_4 + \text{H}^+$  requires 268.1292).

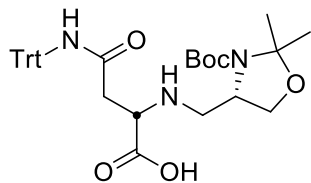

**(S)-2-(((S)-3-(tert-Butyloxycarbonyl)-2,2-dimethyloxazolidin-4-yl)methyl)amino)-4-oxo-4-(tritylamino)butanoic Acid (10).** A solution of (*R*)-(+)-3-Boc-2,2-dimethyloxazolidine-4-carboxaldehyde (**7**, 6.06 mmol, 1.4 g) in anhydrous  $\text{CH}_2\text{Cl}_2$  (20 mL) at 25 °C was treated with *N*<sup>3</sup>-trityl-L-asparagine (**6**, 3.03 mmol, 1.1 g) and powdered 4Å molecular sieves. The suspension was stirred for 15 min before  $\text{NaBH}(\text{OAc})_3$  (7.58 mmol, 1.6 g) was added and the reaction mixture was stirred for 12 h under argon. The reaction was quenched with the slow addition of saturated aqueous  $\text{NaHCO}_3$  until gas evolution ceased. The mixture was poured into  $\text{H}_2\text{O}$  and the product was extracted with  $\text{CH}_2\text{Cl}_2$ . The organic phases were combined, filtered through Celite, dried over anhydrous  $\text{Na}_2\text{SO}_4$ , filtered, and concentrated in vacuo. The residue was dissolved in  $\text{CH}_2\text{Cl}_2$  and purified by flash chromatography ( $\text{SiO}_2$ ) using a gradient elution of 5%  $\text{MeOH}-\text{CH}_2\text{Cl}_2$  to elute the less polar by-products and then 10%  $\text{MeOH}-\text{CH}_2\text{Cl}_2$  to elute **10** (1.6 g, 84%) as an amorphous white solid:  $[\alpha]_{\text{D}}^{23} +8.3$  ( $c$  1.0,  $\text{CHCl}_3$ );  $^1\text{H}$  NMR ( $\text{CD}_3\text{OD}$ , 500 MHz, 55 °C)  $\delta$  7.26 (m, 15H), 4.10 (m, 1H), 3.98 (t,  $J = 8.0$  Hz, 1H), 3.80 (m, 1H), 3.67 (m, 1H), 3.11 (m, 3H), 2.85 (dd,  $J = 8.4, 16.7$  Hz, 1H), 1.48 (s, 3H), 1.45 (s, 3H), 1.44 (s, 9H); IR (film)  $\nu_{\text{max}}$  3056, 2979, 2934, 2882, 1679, 1529, 1492, 1447, 1388, 1377, 1366, 1251, 1170, 766, 700  $\text{cm}^{-1}$ ; HRESI-TOF  $m/z$  588.3072 ( $\text{C}_{34}\text{H}_{41}\text{N}_3\text{O}_6 + \text{H}^+$  requires 588.3068).

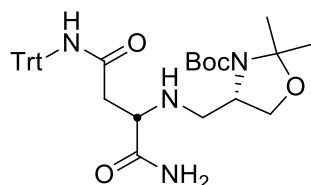

**(S)-tert-Butyl-4-(((S)-1-Amino-1,4-dioxo-4-(tritylamino)butan-2-yl)amino)methyl)-2,2-dimethyloxazolidine-3-carboxylate (11).** A suspension of **10** (0.73 mmol, 0.43 g) and HOBt (0.88 mmol, 0.12 g) in anhydrous  $\text{CH}_2\text{Cl}_2$  (7.3 mL) under argon at 0 °C was treated with EDCI•HCl (0.88 mmol, 0.17 g). The reaction mixture was warmed to 25 °C and stirred for 30 min. The reaction mixture was cooled to 0 °C and a 0.5 M solution of  $\text{NH}_3$  in THF (2.92 mmol, 5.8 mL) was added quickly by syringe. Upon complete addition, the reaction mixture was allowed to warm to 25 °C and stir for 30 min at which time the reaction was judged complete by TLC. The reaction mixture was concentrated in vacuo, redissolved in  $\text{CH}_2\text{Cl}_2$  and purified by flash chromatography ( $\text{SiO}_2$ ) using a gradient elution of 70%  $\text{EtOAc}-\text{hexanes}$  to elute the less polar by-products and then 5%  $\text{MeOH}-\text{CH}_2\text{Cl}_2$  to elute **11** (0.35 g, 81%) as an amorphous white solid:  $[\alpha]_{\text{D}}^{23} +28$  ( $c$  1.0,  $\text{CHCl}_3$ );  $^1\text{H}$  NMR ( $\text{CD}_3\text{CN}$ , 500 MHz, 60 °C)  $\delta$  8.22 (s, 1H), 7.28 (m, 15H), 6.69 (bs, 1H), 5.76 (bs, 1H), 3.80 (m, 2H), 3.70 (m, 1H), 3.39 (m, 1H), 2.75 (m, 2H), 2.57

(m, 3H), 1.50 (s, 3H), 1.46 (s, 9H), 1.44 (s, 3H); IR (film)  $\nu_{\max}$  3301, 1670, 1525, 1492, 1448, 1390, 1367, 1257, 1173, 1085, 700  $\text{cm}^{-1}$ ; HRESI-TOF  $m/z$  587.3238 ( $\text{C}_{34}\text{H}_{42}\text{N}_4\text{O}_5 + \text{H}^+$  requires 587.3228).

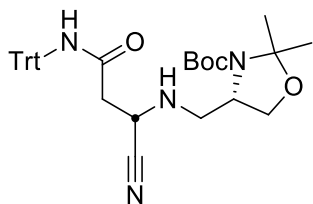

**(S)-tert-Butyl-4-(((S)-1-Cyano-3-oxo-3-(tritylamino)propyl)amino)methyl)-2,2-dimethyloxazolidine-3-carboxylate (12).** A solution of **11** (1.5 mmol, 0.88 g) in anhydrous THF (15 mL) at 0 °C was treated with *i*-Pr<sub>2</sub>NEt (6.0 mmol, 1 mL). This mixture was treated with a 50% wt. solution of T3P in EtOAc (6.0 mmol, 3.6 mL). Upon complete addition, the reaction mixture was warmed at 50 °C and allowed to stir until complete conversion was noted by TLC (~2 h). The reaction was quenched with addition of water and the product was extracted with CH<sub>2</sub>Cl<sub>2</sub>. The organic phases were combined, dried over anhydrous Na<sub>2</sub>SO<sub>4</sub>, filtered, and concentrated in vacuo. The residue was redissolved in CH<sub>2</sub>Cl<sub>2</sub> and purified by flash chromatography (SiO<sub>2</sub>, 50% EtOAc–hexanes) to provide **12** (0.8 g, 94%) as an amorphous white solid:  $[\alpha]_D^{23} +3.0$  (*c* 1.0, CHCl<sub>3</sub>); <sup>1</sup>H NMR (CD<sub>3</sub>CN, 500 MHz, 60 °C)  $\delta$  7.70 (s, 1H), 7.28 (m, 15H), 3.97 (dd, *J* = 5.7, 7.6 Hz, 1H), 3.88 (m, 2H), 3.77 (d, *J* = 7.9 Hz, 1H), 3.02 (m, 1H), 2.70 (m, 3H), 1.53 (s, 3H), 1.47 (s, 9H), 1.46 (s, 3H); IR (film)  $\nu_{\max}$  3305, 3056, 2978, 2928, 2873, 1690, 1660, 1597, 1527, 1492, 1448, 1389, 1367, 1259, 1171, 1087, 847, 700  $\text{cm}^{-1}$ ; HRESI-TOF  $m/z$  569.3121 ( $\text{C}_{34}\text{H}_{40}\text{N}_4\text{O}_4 + \text{H}^+$  requires 569.3122).

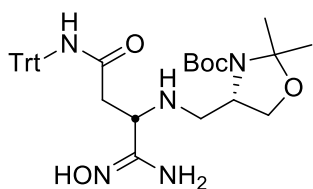

**(S)-tert-Butyl-4-(((S)-1-Amino-1-(hydroxyimino)-4-oxo-4-(tritylamino)butan-2-yl)amino)methyl)-2,2-dimethyloxazolidine-3-carboxylate (13).** A solution of **12** (0.03 mmol, 17 mg) dissolved in absolute EtOH (0.5 mL) at 25 °C was treated with a 50% aqueous solution of NH<sub>2</sub>OH (0.12 mmol, 8  $\mu\text{L}$ ). The resulting mixture was stirred at 25 °C until complete conversion of starting material was observed by TLC (~12 h). The reaction mixture was concentrated in vacuo and the residue dissolved in CH<sub>2</sub>Cl<sub>2</sub> and purified by PTLC (SiO<sub>2</sub>, 5% MeOH–CH<sub>2</sub>Cl<sub>2</sub>). The product **13** was isolated as a white amorphous solid (16 mg, 90%):  $[\alpha]_D^{23} +24$  (*c* 1.0, CHCl<sub>3</sub>); <sup>1</sup>H NMR (CD<sub>3</sub>CN, 500 MHz, 60 °C)  $\delta$  8.15 (s, 1H), 7.28 (m, 15H), 4.84 (s, 2H), 3.79 (m, 2H), 3.70 (m, 1H), 3.41 (dd, *J* = 5.8, 7.3 Hz, 1H), 2.78 (m, 1H), 2.51 (m, 3H), 1.50 (s, 3H), 1.45 (s, 9H), 1.43 (s, 3H); IR (film)  $\nu_{\max}$  3320, 3057, 2980, 2930, 1663, 1597, 1492, 1448, 1392, 1366, 1257, 1173, 1103, 851, 753, 701  $\text{cm}^{-1}$ ; HRESI-TOF  $m/z$  602.3337 ( $\text{C}_{34}\text{H}_{43}\text{N}_5\text{O}_5 + \text{H}^+$  requires 602.3337).

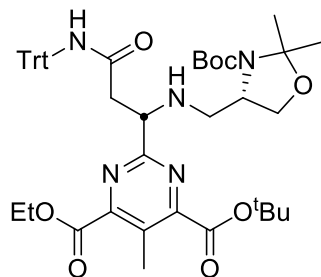

**4-tert-Butyl-6-Ethyl-2-((S)-1-(((S)-3-(tert-Butyloxycarbonyl)-2,2-dimethyloxazolidin-4-yl)methyl)amino)-3-oxo-3-(tritylamino)propyl)-5-methylpyrimidine-4,6-dicarboxylate (**14**).**

**Amidine preparation:** A solution of **13** (0.083 mmol, 50 mg) in MeOH (3 mL) was treated with glacial AcOH (0.170 mmol, 10  $\mu$ L) followed by a spatula tip of Raney<sup>®</sup> 2800 Nickel as an aqueous cake. This suspension was stirred at 25 °C until complete consumption of the amidoxime was evident by TLC. The reaction mixture was filtered through a Celite plug and concentrated in vacuo without allowing the temperature of the sample to increase above 30 °C. The residue was redissolved in CH<sub>2</sub>Cl<sub>2</sub> and concentrated two additional times to remove residual MeOH. The resulting residue was treated with CH<sub>2</sub>Cl<sub>2</sub> (2 mL) followed by 1 N aqueous NaOH (2 mL). This mixture was shaken briefly before the organic layer was extracted, dried over Na<sub>2</sub>SO<sub>4</sub>, and concentrated in vacuo, without allowing the temperature of the sample to increase above 30 °C, to yield the free-based amidine **4** (41 mg, 84%). The resulting residue was then briefly dried under high vacuum and used within 1 h.

**Inverse electron demand Diels-Alder reaction:** A solution of powdered 4 Å molecular sieves and 1,2,3-triazine **5a** (0.034 mmol, 9.0 mg) in anhydrous CH<sub>3</sub>CN (35  $\mu$ L) cooled to 5 °C was treated with a solution of crude amidine **4** (0.017 mmol, 10 mg) in anhydrous CH<sub>3</sub>CN (50  $\mu$ L) dropwise. This mixture was stirred at 5 °C for 14 h at which time the reaction mixture was allowed to warm to ambient temperature and stir for 6 h. The reaction mixture was filtered through Celite and concentrated in vacuo. The resulting residue was dissolved in CH<sub>2</sub>Cl<sub>2</sub> and purified by flash chromatography (SiO<sub>2</sub>, 30% EtOAc–hexanes) to yield **14** as a tan film (7.4 mg, 54%):  $[\alpha]_D^{23} +0.32$  (*c* 0.48, CHCl<sub>3</sub>); <sup>1</sup>H NMR (CD<sub>3</sub>CN, 500 MHz, 60 °C)  $\delta$  8.80 (s, 1H), 7.20 (m, 15H), 4.43 (q, *J* = 7.1 Hz, 2H), 4.20 (dd, *J* = 4.9, 7.5 Hz, 1H), 3.73 (m, 2H), 3.67 (d, *J* = 3.8 Hz, 2H), 2.70 (m, 5H), 2.43 (s, 3H), 1.60 (s, 9H), 1.45 (s, 3H), 1.40 (bs, 12H), 1.36 (t, *J* = 7.1 Hz, 3H); IR (film)  $\nu_{\max}$  2975, 2928, 1735, 1690, 1550, 1491, 1447, 1367, 1250, 1155, 1082, 1034, 844, 734, 699 cm<sup>-1</sup>; HRESI-TOF *m/z* 808.4278 (C<sub>46</sub>H<sub>57</sub>N<sub>5</sub>O<sub>8</sub> + H<sup>+</sup> requires 808.4280).

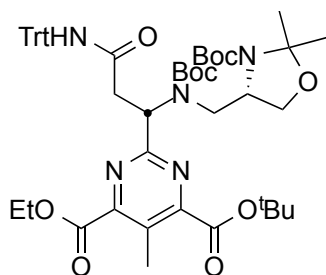

**4-tert-Butyl-6-Ethyl-2-((S)-1-((tert-Butyloxycarbonyl)amino)-3-(tert-butylamino)-2,2-dimethyloxazolidin-4-yl)methyl)-3-oxo-3-(tritylamino)propyl)-5-methylpyrimidine-4,6-dicarboxylate (**15**).** A solution of **14** (0.021 mmol, 17 mg) in anhydrous THF was treated with Et<sub>3</sub>N (0.084 mmol, 16 mg) followed by Boc<sub>2</sub>O (0.074 mmol, 16 mg) at 25 °C. The reaction

mixture was warmed at 50 °C and stirred for 12 h, upon which complete conversion was noted by TLC. The reaction mixture was concentrated, redissolved in CHCl<sub>3</sub> and purified by PTLC (SiO<sub>2</sub>, 30% EtOAc–hexanes). Product **15** was isolated as a white film (17 mg, 90%):  $[\alpha]_{\text{D}}^{23} -22$  (*c* 1.0, CHCl<sub>3</sub>); <sup>1</sup>H NMR (CD<sub>3</sub>CN, 500 MHz, 60 °C)  $\delta$  7.33–7.17 (m, 16H), 4.94 (bs, 1H), 4.40 (qd, *J* = 2.7, 7.1 Hz, 2H), 4.15 (m, 2H), 3.88 (ddd, *J* = 3.0, 5.7, 8.1 Hz, 1H), 3.77 (bs, 1H), 3.48 (m, 1H), 3.07 (bs, 2H), 2.43 (s, 3H), 1.59 (s, 9H), 1.55 (s, 3H), 1.44 (s, 3H), 1.35 (t, *J* = 7.1 Hz, 3H), 1.35 (bs, 9H), 1.20 (bs, 9H); IR (film)  $\nu_{\text{max}}$  2975, 2931, 1737, 1694, 1559, 1488, 1424, 1390, 1368, 1254, 1162, 1074, 851, 701 cm<sup>-1</sup>; HRESI-TOF *m/z* 908.4824 (C<sub>51</sub>H<sub>65</sub>N<sub>5</sub>O<sub>10</sub> + H<sup>+</sup> requires 908.4804).

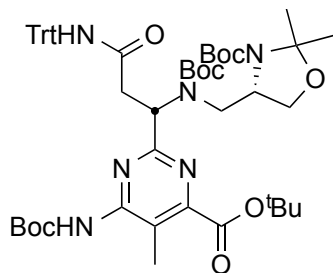

**(S)-tert-Butyl-4-(((tert-Butyloxycarbonyl)((S)-1-(4-(tert-butyloxycarbonyl)-6-((tert-butyloxycarbonyl)amino)-5-methylpyrimidin-2-yl)-3-oxo-3-(tritylamino)propyl)amino)methyl)-2,2-dimethylazolidine-3-carboxylate (16).** A solution of **15** (0.018 mmol, 16 mg) in THF:MeOH (800  $\mu$ L, 3:1) was treated with 1 N aqueous NaOH (135  $\mu$ L) dropwise at 0 °C. The reaction mixture was stirred at 0 °C. After 10 min, complete conversion was noted by TLC. The reaction mixture was quenched with addition of 1 N aqueous HCl to a pH < 4 and the product was extracted with CH<sub>2</sub>Cl<sub>2</sub>. The organic layer was concentrated and lyophilized. The residue was redissolved in anhydrous <sup>t</sup>BuOH (200  $\mu$ L), to which Et<sub>3</sub>N (0.040 mmol, 6  $\mu$ L) and DPPA (0.036 mmol, 8  $\mu$ L) were added at 25 °C. The reaction mixture was warmed at reflux and monitored by TLC. After 4 h, complete conversion was noted and the reaction mixture was concentrated. The residue was redissolved in CH<sub>2</sub>Cl<sub>2</sub> and purified by flash chromatography (SiO<sub>2</sub>, 30% EtOAc–hexanes). Product **16** was isolated as a white amorphous solid (13 mg, 78% for 2-steps):  $[\alpha]_{\text{D}}^{23} -24$  (*c* 0.52, CHCl<sub>3</sub>); <sup>1</sup>H NMR (CD<sub>3</sub>CN, 500 MHz, 60 °C)  $\delta$  7.51 (s, 1H), 7.32–7.19 (m, 15H), 5.00–4.73 (m, 1H), 4.26–4.15 (m, 1H), 4.15–4.06 (m, 1H), 3.93–3.83 (m, 1H), 3.83–3.67 (m, 1H), 3.56–3.43 (m, 1H), 3.13–2.87 (m, 2H), 2.21 (s, 3H), 1.58 (s, 9H), 1.54 (s, 3H), 1.47 (s, 9H), 1.43 (s, 3H), 1.42–1.10 (m, 18H); IR (film)  $\nu_{\text{max}}$  2978, 2960, 2928, 1688, 1578, 1563, 1490, 1392, 1325, 1285, 1251, 1161, 1090, 1021, 847, 768, 700 cm<sup>-1</sup>; HRESI-TOF *m/z* 951.5219 (C<sub>53</sub>H<sub>70</sub>N<sub>6</sub>O<sub>10</sub> + H<sup>+</sup> requires 951.5226).

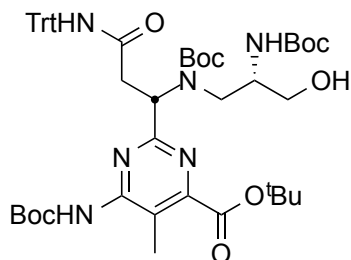

***tert*-Butyl-2-((5*S*,8*S*)-6-((*tert*-Butyloxycarbonyl)-8-(hydroxymethyl)-12,12-dimethyl-3,10-dioxo-1,1,1-triphenyl-11-oxa-2,6,9-triazatridecan-5-yl)-6-((*tert*-butyloxycarbonyl)amino)-5-methylpyrimidine-4-carboxylate (17).** Compound **16** (0.013 mmol, 12 mg) was dissolved in MeOH (200  $\mu$ L) and *p*-TsOH monohydrate (0.006 mmol, 1.2 mg) was added in one portion at 25  $^{\circ}$ C. The reaction mixture was stirred at 25  $^{\circ}$ C for 3 h, upon which time complete conversion was noted by TLC. The reaction was quenched with the addition of saturated aqueous NaHCO<sub>3</sub> and extracted with EtOAc. The organic phases were combined, washed with saturated aqueous NaCl, dried over anhydrous Na<sub>2</sub>SO<sub>4</sub> and concentrated. The residue was purified by PTLC (SiO<sub>2</sub>, 40% EtOAc–hexanes) to yield **17** as a film (8.3 mg, 72%):  $[\alpha]_{\text{D}}^{23} -27$  (*c* 0.42, CHCl<sub>3</sub>); <sup>1</sup>H NMR (CD<sub>3</sub>CN, 500 MHz, 60  $^{\circ}$ C)  $\delta$  7.47 (s, 1H), 7.32–7.18 (m, 15H), 5.69–5.53 (m, 1H), 4.94–4.85 (m, 1H), 3.82–3.73 (m, 1H), 3.73–3.61 (m, 1H), 3.61–3.47 (m, 3H), 3.15 (dd, *J* = 6.1, 14.5 Hz, 1H), 2.95–2.81 (m, 1H), 2.22 (s, 3H), 1.58 (s, 9H), 1.47 (s, 9H), 1.38 (s, 9H), 1.23 (bs, 9H); IR (film)  $\nu_{\text{max}}$  3315 (broad), 2979, 2931, 1679, 1559, 1493, 1394, 1248, 1157, 1096, 1053, 846, 752, 702, 631, 584 cm<sup>-1</sup>; HRESI-TOF *m/z* 911.4909 (C<sub>50</sub>H<sub>66</sub>N<sub>6</sub>O<sub>10</sub> + H<sup>+</sup> requires 911.4913).

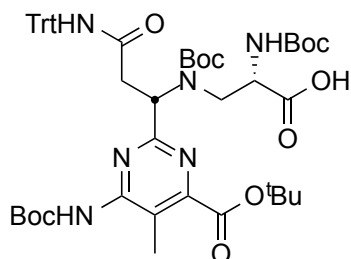

**(*S*)-3-((*tert*-Butyloxycarbonyl)((*S*)-1-(4-((*tert*-Butyloxycarbonyl)-6-((*tert*-butyloxycarbonyl)amino)-5-methylpyrimidin-2-yl)-3-oxo-3-(tritylamino)propyl)amino)-2-((*tert*-butyloxycarbonyl)amino)propanoic Acid (18).** A solution of **17** (0.011 mmol, 10 mg) in acetone (200  $\mu$ L) cooled to 0  $^{\circ}$ C was treated with a solution of 2.5 M Jones' reagent (12  $\mu$ L). The reaction mixture was stirred at 0  $^{\circ}$ C for 1 h, upon which time complete conversion was noted by TLC. Isopropanol (100  $\mu$ L) was added dropwise to quench the reaction. Concentration under a stream of nitrogen provided a residue that was redissolved in a mixture of H<sub>2</sub>O and EtOAc. The organic layer was collected, dried over anhydrous Na<sub>2</sub>SO<sub>4</sub>, filtered and concentrated. The resulting residue was purified by PTLC (SiO<sub>2</sub>, 50% EtOAc–hexanes containing 1–2% AcOH). The carboxylic acid **18** was isolated as a white amorphous solid (9 mg, 88%):  $[\alpha]_{\text{D}}^{23} -7.5$  (*c* 0.53, CHCl<sub>3</sub>); <sup>1</sup>H NMR (CD<sub>3</sub>CN, 500 MHz, 60  $^{\circ}$ C)  $\delta$  7.49 (s, 1H), 7.28–7.19 (m, 15H), 4.99–4.88 (m, 1H), 4.32–4.21 (m, 1H), 3.88–3.79 (m, 1H), 3.61–3.54 (m, 1H), 3.37–3.25 (m, 3H), 3.06–2.87 (m, 2H), 2.23 (s, 3H), 1.58 (s, 9H), 1.47 (s, 9H), 1.38 (s, 9H), 1.26 (bs, 9H); IR (film)  $\nu_{\text{max}}$  2962, 2925, 2852, 1692, 1561, 1492, 1452, 1393, 1367, 1317, 1258, 1156, 1096, 1021, 844, 799, 700 cm<sup>-1</sup>; HRESI-TOF *m/z* 925.4687 (C<sub>50</sub>H<sub>64</sub>N<sub>6</sub>O<sub>11</sub> + H<sup>+</sup> requires 925.4706).

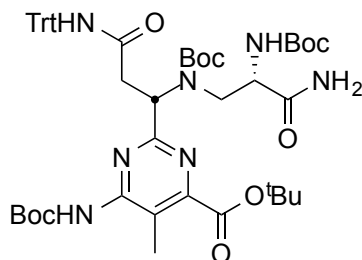

**tert-Butyl-2-((5S,8S)-6-(tert-Butyloxycarbonyl)-8-carbamoyl-12,12-dimethyl-3,10-dioxo-1,1,1-triphenyl-11-oxa-2,6,9-triazatridecan-5-yl)-6-((tert-butyloxycarbonyl)amino)-5-methylpyrimidine-4-carboxylate (19).** A solution of **18** (0.005 mmol, 4.6 mg) and HOBt (0.006 mmol, 0.8 mg) in anhydrous CH<sub>2</sub>Cl<sub>2</sub> (125 μL) at 0 °C was treated with EDCI (0.006 mmol, 1.2 mg). Upon complete addition of EDCI, the reaction mixture was warmed to 25 °C and stirred for 30 min, before being re-cooled to 0 °C and the addition of 0.5 M NH<sub>3</sub> in THF (40 μL). Precipitation formed as a consequence of the addition. The reaction mixture was warmed to 25 °C and stirred for 30 min, upon which time complete conversion was noted by TLC. The reaction mixture was loaded directly onto a PTLC plate (SiO<sub>2</sub>) and purified using 3% MeOH–CH<sub>2</sub>Cl<sub>2</sub> as the eluent. Compound **19** was isolated as a white film (4.4 mg, 95%): [α]<sub>D</sub><sup>23</sup> –8.9 (*c* 0.35, CHCl<sub>3</sub>); <sup>1</sup>H NMR (CD<sub>3</sub>CN, 500 MHz, 60 °C) δ 7.45 (s, 1H), 7.31–7.19 (m, 15H), 4.96–4.86 (m, 1H), 4.24 (q, *J* = 6.8 Hz, 1H), 3.88–3.80 (m, 1H), 3.59 (dd, *J* = 7.2, 15.3 Hz, 1H), 3.38–3.26 (m, 1H), 3.00–2.77 (m, 1H), 2.24 (s, 3H), 1.58 (s, 9H), 1.47 (s, 9H), 1.39 (s, 9H), 1.36–1.16 (m, 9H); IR (film) ν<sub>max</sub> 2976, 2925, 2854, 1728, 1689, 1558, 1492, 1452, 1412, 1393, 1368, 1247, 1158, 700 cm<sup>-1</sup>; HRESI-TOF *m/z* 924.4862 (C<sub>50</sub>H<sub>65</sub>N<sub>7</sub>O<sub>10</sub> + H<sup>+</sup> requires 924.4865).

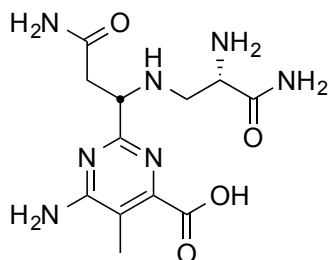

**6-Amino-2-(((S)-3-amino-1-(((S)-2,3-diamino-3-oxopropyl)amino)-3-oxopropyl)-5-methylpyrimidine-4-carboxylic Acid ((-)-Pyrimidoblamic Acid, 2).** Compound **19** (0.006 mmol, 6 mg) was dissolved in TFA:CH<sub>2</sub>Cl<sub>2</sub> (500 μL, 3:2). This reaction mixture was stirred at room temperature and monitored by LC/MS. After 16 h, complete conversion to the desired product was observed. The reaction was quenched by dropwise addition of MeOH and concentrated under a nitrogen stream. The resulting residue was purified by reverse-phase HPLC (C18, 25 x 100 mm, 8 mL/min, R<sub>T</sub> = 9.6 min) utilizing a H<sub>2</sub>O:CH<sub>3</sub>CN gradient to yield the TFA salt of **2**. The isolated residue was treated with 1 N aqueous HCl to provide the desired HCl salt of (–)-pyrimidoblamic acid (**2**) as an off white amorphous solid (1.9 mg, quant.) identical in all respects with authentic material: [α]<sub>D</sub><sup>23</sup> –30 (*c* 0.07, H<sub>2</sub>O); lit<sup>1</sup> [α]<sub>D</sub><sup>25</sup> –27 (*c* 0.12, H<sub>2</sub>O); <sup>1</sup>H NMR (D<sub>2</sub>O, 600 MHz) δ 4.22 (dd, *J* = 5.6, 8.0 Hz, 1H), 4.13 (dd, *J* = 4.5, 6.8 Hz, 1H), 3.19 (dd, *J* = 4.6, 13.7 Hz, 1H), 3.07 (dd, *J* = 6.8, 13.6 Hz, 1H), 2.89 (dd, *J* = 5.4, 15.8 Hz, 1H), 2.82 (dd, *J* = 7.7, 15.8 Hz, 1H), 2.23 (s, 3H); <sup>13</sup>C NMR (D<sub>2</sub>O, 150 MHz) δ 175.6, 174.4, 172.4, 171.1, 167.0, 162.3, 111.6, 57.8, 53.2, 47.7, 39.0, 11.9; IR (neat) ν<sub>max</sub> 3456, 3247, 1695, 1681, 1557, 1161, 1078, 820 cm<sup>-1</sup>; HRESI-TOF *m/z* 326.1563 (C<sub>12</sub>H<sub>19</sub>N<sub>7</sub>O<sub>4</sub> + H<sup>+</sup> requires 326.1571).

<sup>1</sup>Boger, D.L.; Honda, T.; Dang, Q. *J. Am. Chem. Soc.* **1994**, *116*, 5619.

### **<sup>1</sup>H NMR Comparison**

#### ***Synthetic Pyrimidoblamic Acid*** (600 MHz, D<sub>2</sub>O)

4.22 (dd, *J* = 5.6, 8.0 Hz, 1H)  
4.13 (dd, *J* = 4.5, 6.8 Hz, 1H)  
3.19 (dd, *J* = 4.6, 13.7 Hz, 1H)  
3.07 (dd, *J* = 6.8, 13.6 Hz, 1H)  
2.89 (dd, *J* = 5.4, 15.8 Hz, 1H)  
2.82 (dd, *J* = 7.7, 15.8 Hz, 1H)  
2.23 (s, 3H)

#### ***Authentic Pyrimidoblamic Acid*<sup>2</sup>** (400 MHz, D<sub>2</sub>O)

4.24 (dd, *J* = 7.9, 7.9 Hz, 1H)  
4.12 (dd, *J* = 4.5, 6.6 Hz, 1H)  
3.21 (dd, *J* = 4.5, 13.7 Hz, 1H)  
3.08 (dd, *J* = 6.6, 13.7 Hz, 1H)  
2.89 (dd, *J* = 5.4, 15.8 Hz, 1H)  
2.82 (dd, *J* = 7.4, 15.8 Hz, 1H)  
2.22 (s, 3H)

---

### **<sup>13</sup>C NMR Comparison**

#### ***Synthetic Pyrimidoblamic Acid*** (150 MHz, D<sub>2</sub>O)

175.6  
174.4  
172.4  
171.1  
167.0  
162.3  
111.6  
57.8  
53.2  
47.7  
39.0  
11.9

#### ***Authentic Pyrimidoblamic Acid*<sup>2</sup>** (100 MHz, D<sub>2</sub>O)

Not Reported



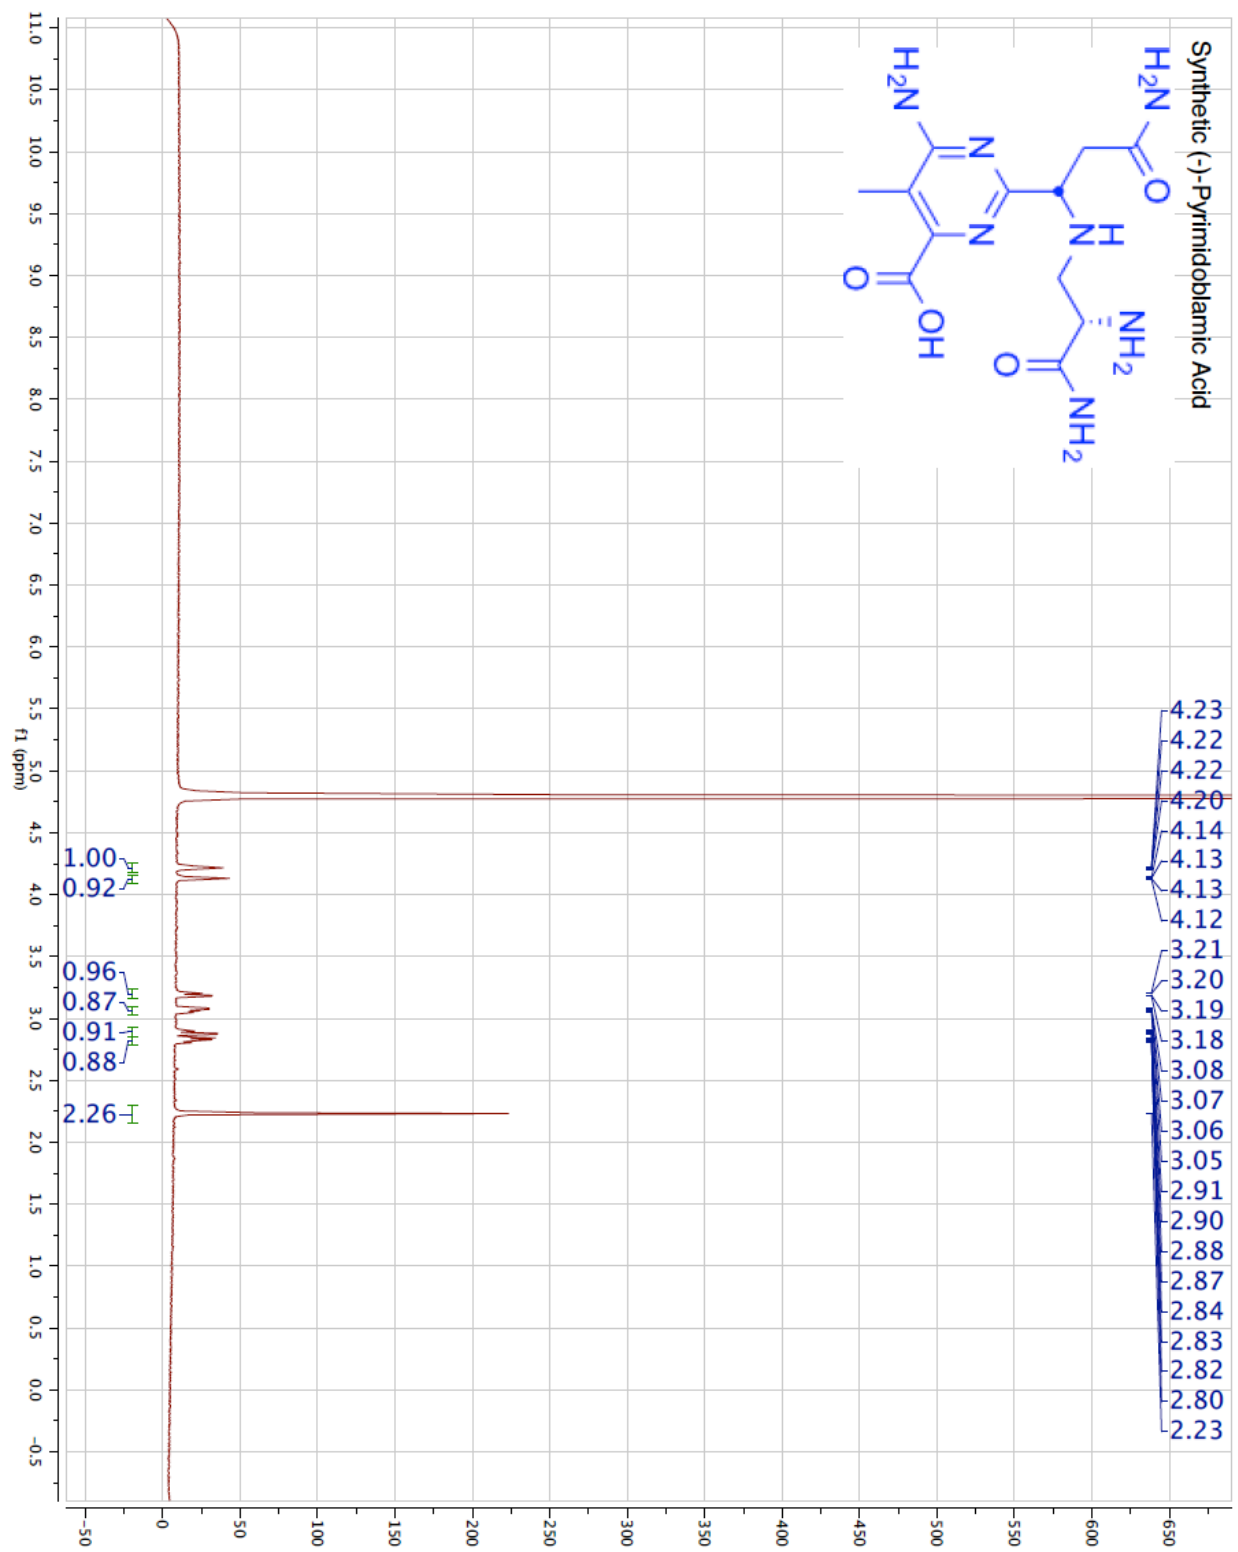

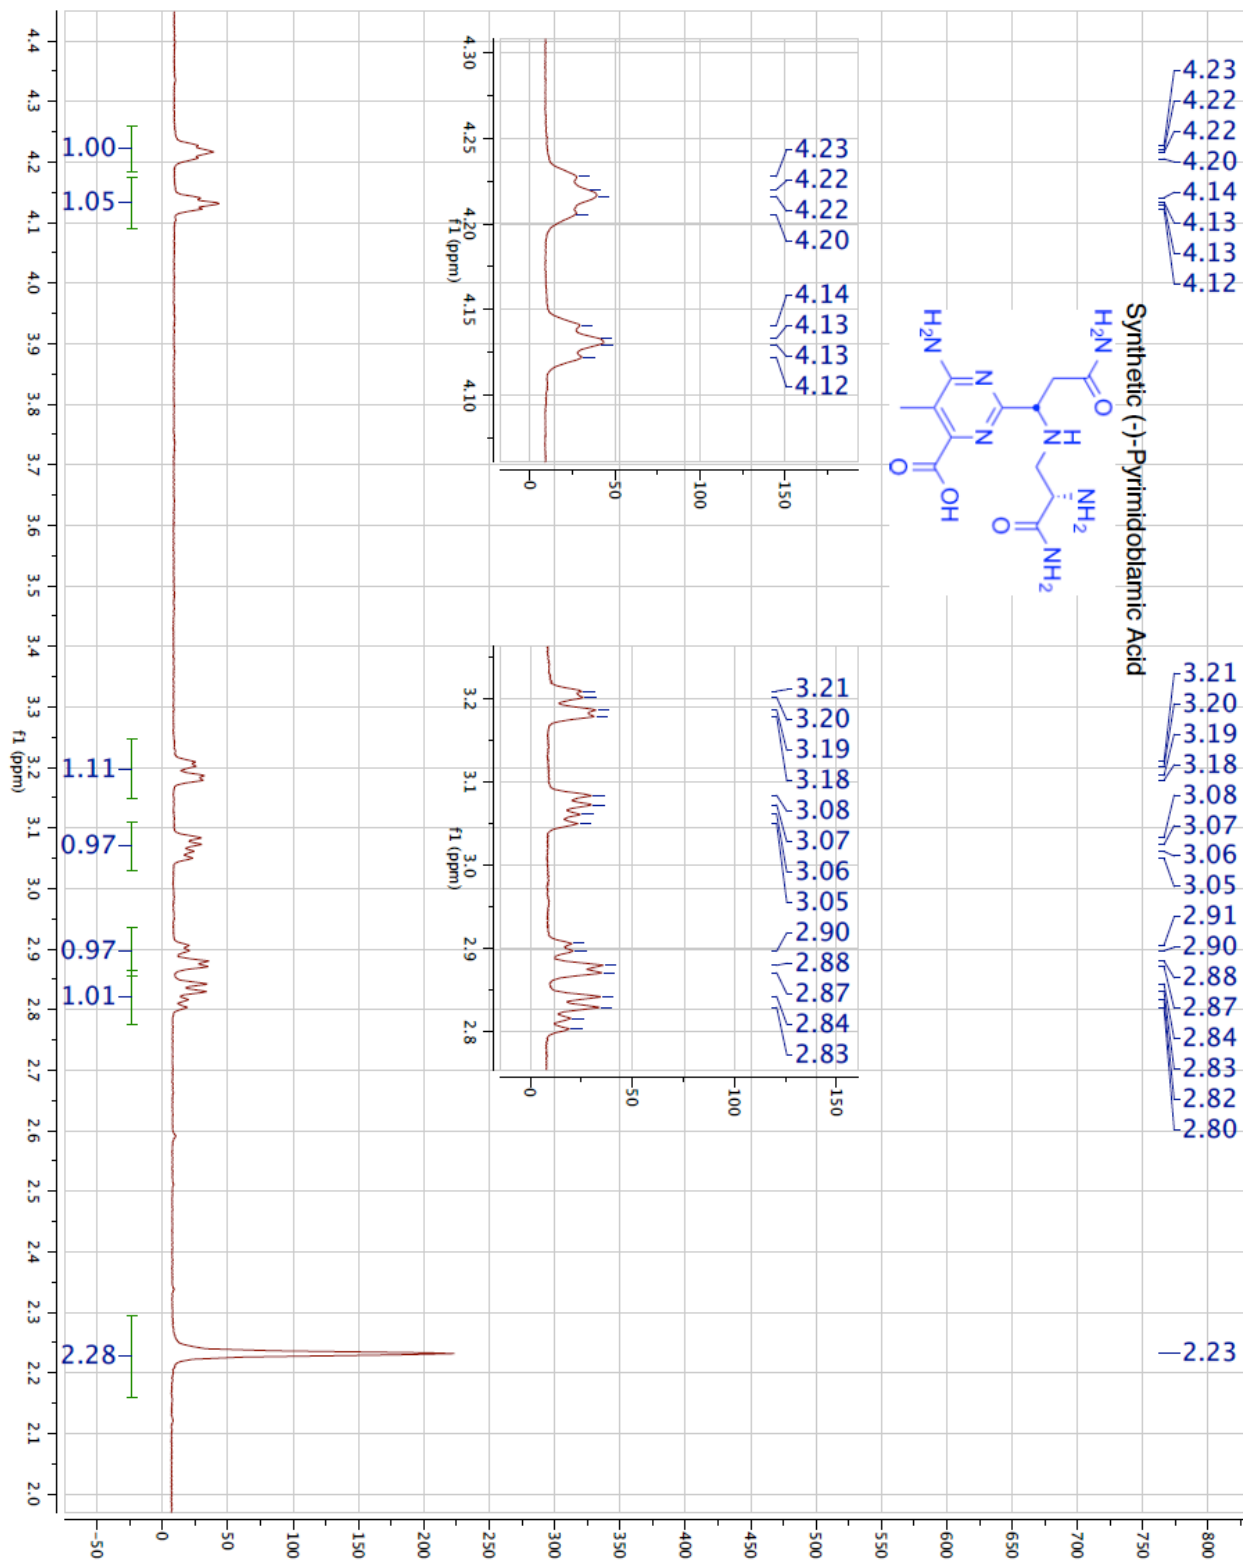

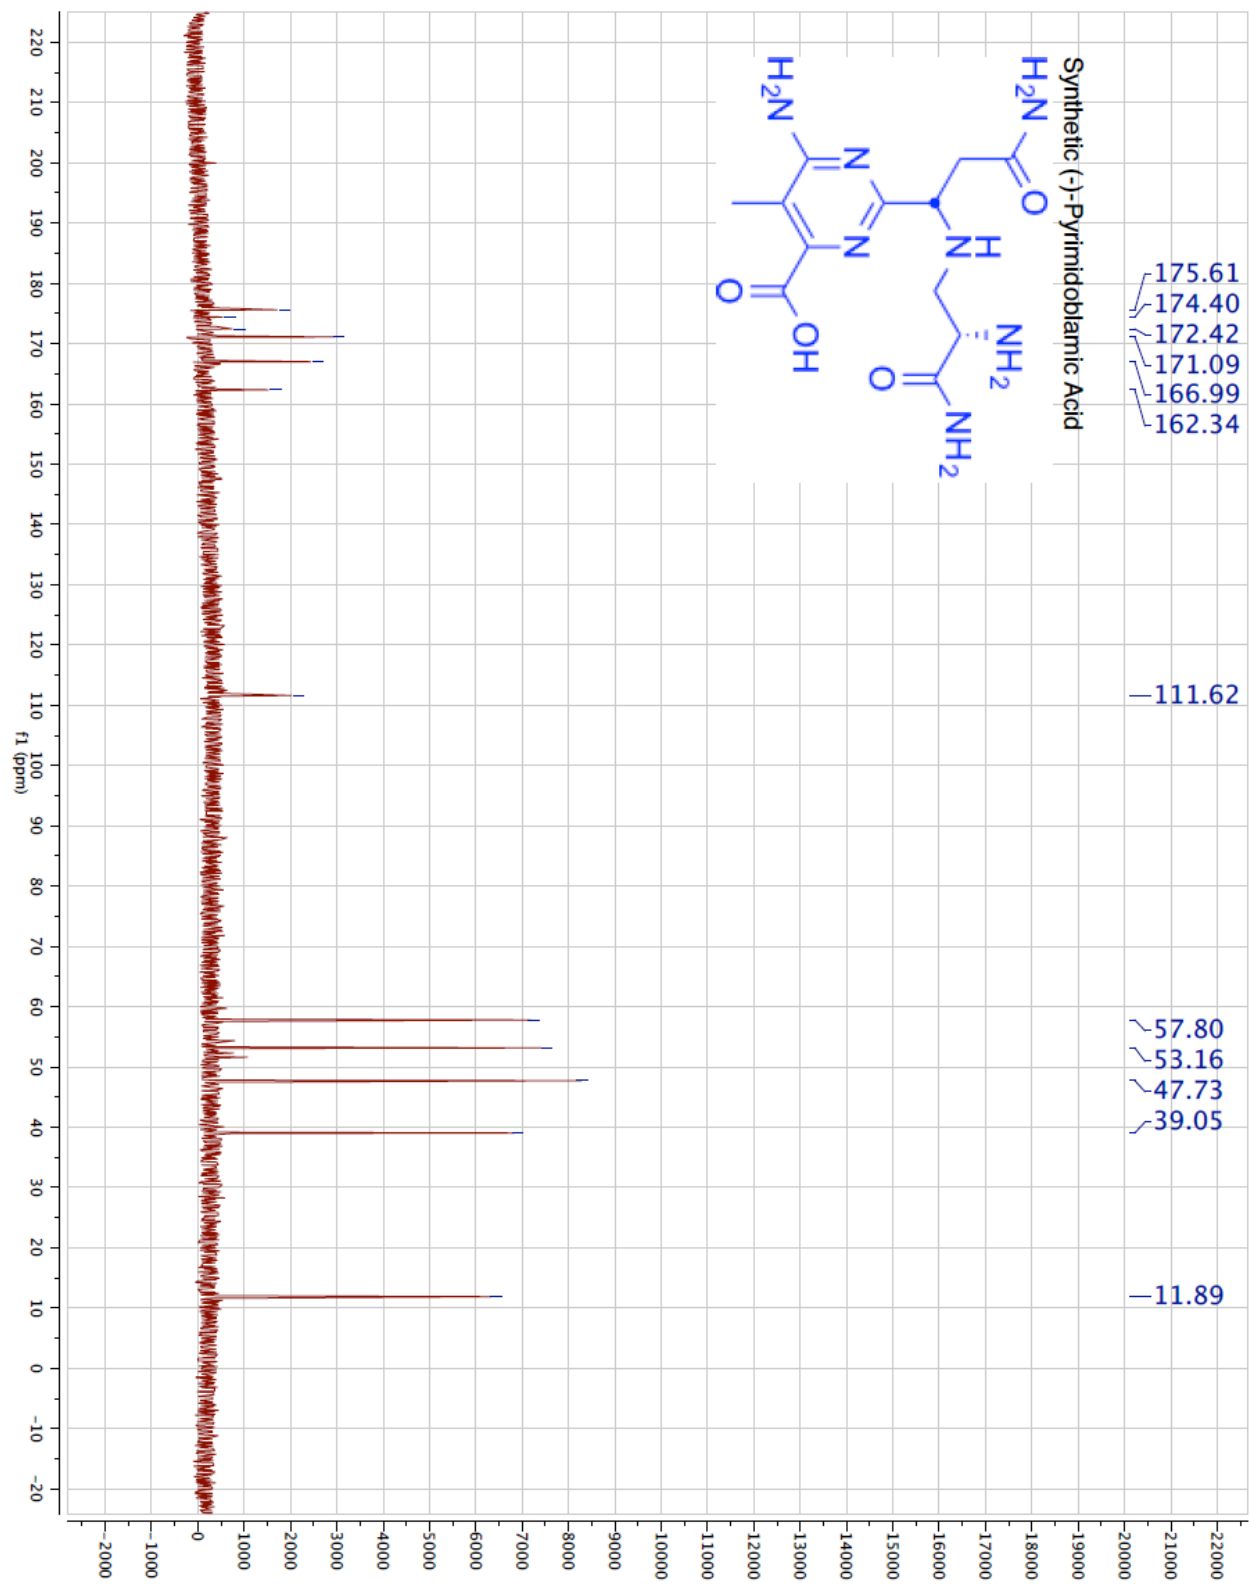

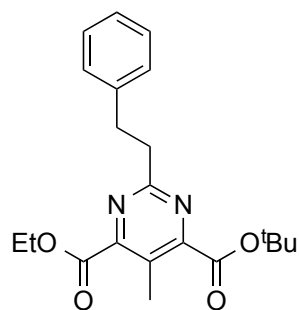

**4-(tert-Butyl) 6-Ethyl 5-Methyl-2-phenethylpyrimidine-4,6-dicarboxylate (20).** A solution of **5a** (0.075 mmol, 20 mg) in anhydrous CH<sub>3</sub>CN (160 μL) at 25 °C was treated with a solution of free-based 3-phenylpropanimidamide (0.037 mmol, 5.5 mg) in anhydrous CH<sub>3</sub>CN (125 μL). The reaction mixture was stirred at 25 °C for 16 h, upon which time the mixture was filtered through Celite and concentrated in vacuo. The residue was purified by flash chromatography (SiO<sub>2</sub>, 10% EtOAc–hexanes) to yield **20** as a clear oil (9.0 mg, 66%): <sup>1</sup>H NMR (CDCl<sub>3</sub>, 600 MHz) δ 7.31–7.23 (m, 4H), 7.20–7.17 (m, 1H), 4.48 (q, *J* = 7.1 Hz, 2H), 3.36–3.29 (m, 2H), 3.19–3.12 (m, 2H), 2.44 (s, 3H), 1.64 (s, 9H), 1.43 (t, *J* = 7.1 Hz, 3H); <sup>13</sup>C NMR (CDCl<sub>3</sub>, 150 MHz) δ 168.1, 165.4, 164.7, 160.3, 158.1, 141.4, 128.7 (2C), 128.5 (2C), 126.1, 123.0, 84.4, 62.6, 40.4, 34.4, 28.3 (3C), 14.3, 14.2; IR (neat) ν<sub>max</sub> 2977, 2927, 1736, 1556, 1453, 1406, 1370, 1253, 1224, 1163, 1135, 1045, 845, 751, 700 cm<sup>-1</sup>; HRESI-TOF *m/z* 371.1963 (C<sub>21</sub>H<sub>26</sub>N<sub>2</sub>O<sub>4</sub> + H<sup>+</sup> requires 371.1965).

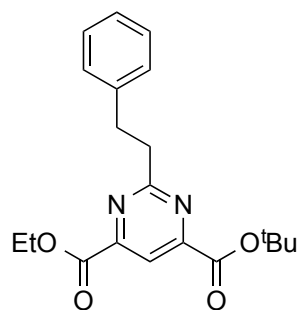

**4-(tert-Butyl) 6-Ethyl 2-Phenethylpyrimidine-4,6-dicarboxylate (21).** A solution of **5b** (0.079 mmol, 20 mg) in anhydrous CH<sub>3</sub>CN (170 μL) at 25 °C was treated with a solution of free-based 3-phenylpropanimidamide (0.04 mmol, 6.0 mg) in anhydrous CH<sub>3</sub>CN (135 μL). The reaction mixture was stirred at 25 °C for 4 h, upon which time the mixture was filtered through Celite and concentrated in vacuo. The residue was purified by flash chromatography (SiO<sub>2</sub>, 20% EtOAc–hexanes) to yield **21** as a clear oil (12.7 mg, 89%): <sup>1</sup>H NMR (CDCl<sub>3</sub>, 600 MHz) δ 8.30 (s, 1H), 7.32–7.23 (m, 4H), 7.21–7.16 (m, 1H), 4.52 (q, *J* = 7.1 Hz, 2H), 3.54–3.45 (m, 2H), 3.27–3.17 (m, 2H), 1.65 (s, 9H), 1.46 (t, *J* = 7.1 Hz, 3H); <sup>13</sup>C NMR (CDCl<sub>3</sub>, 150 MHz) δ 172.3, 164.1, 162.6, 158.8, 157.5, 141.2, 128.7 (2C), 128.5 (2C), 126.2, 117.5, 84.1, 63.0, 41.0, 34.4, 28.1 (3C), 14.4; IR (neat) ν<sub>max</sub> 2980, 2931, 1746, 1727, 1555, 1386, 1454, 1386, 1370, 1276, 1256, 1202, 1157, 1103, 1025, 844, 756, 701 cm<sup>-1</sup>; HRESI-TOF *m/z* 357.1816 (C<sub>20</sub>H<sub>24</sub>N<sub>2</sub>O<sub>4</sub> + H<sup>+</sup> requires 357.1809).

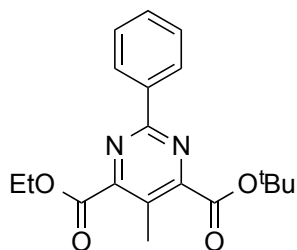

**4-(tert-Butyl) 6-Ethyl 5-Methyl-2-phenylpyrimidine-4,6-dicarboxylate (22).** A solution of **5a** (0.094 mmol, 25 mg) in anhydrous CH<sub>3</sub>CN (200 μL) at 25 °C was treated with a solution of free-based benzamidine (0.062 mmol, 7.5 mg) in anhydrous CH<sub>3</sub>CN (200 μL). The reaction mixture was stirred at 60 °C for 16 h, upon which time the mixture was cooled to 25 °C, filtered through Celite, and concentrated in vacuo. The residue was purified by flash chromatography (SiO<sub>2</sub>, 10% EtOAc–hexanes) to yield **22** as a clear oil (13.2 mg, 62%): <sup>1</sup>H NMR (CDCl<sub>3</sub>, 400 MHz) δ 8.54–8.39 (m, 2H), 7.54–7.39 (m, 3H), 4.50 (q, *J* = 7.1 Hz, 2H), 2.49 (s, 3H), 1.66 (s, 9H), 1.46 (t, *J* = 7.1 Hz, 3H); <sup>13</sup>C NMR (CDCl<sub>3</sub>, 125 MHz) δ 165.5, 164.8, 162.4, 160.5, 158.4, 136.4, 131.2, 128.64 (2C), 128.59 (2C), 123.5, 84.3, 62.5, 28.3 (3C), 14.4, 14.3; IR (neat) ν<sub>max</sub> 2981, 2930, 1736, 1555, 1454, 1397, 1373, 1292, 1254, 1161, 1134, 1095, 1044, 846, 748, 721, 695 cm<sup>-1</sup>; HRESI-TOF *m/z* 343.1658 (C<sub>19</sub>H<sub>22</sub>N<sub>2</sub>O<sub>4</sub> + H<sup>+</sup> requires 343.1652).

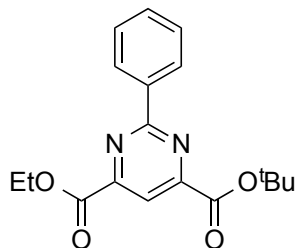

**4-(tert-Butyl) 6-Ethyl 2-Phenylpyrimidine-4,6-dicarboxylate (23).** A solution of **5b** (0.090 mmol, 22.7 mg) in anhydrous CH<sub>3</sub>CN (200 μL) at 25 °C was treated with a solution of free-based benzamidine (0.066 mmol, 8.0 mg) in anhydrous CH<sub>3</sub>CN (200 μL). The reaction mixture was stirred at 60 °C for 16 h, upon which time the mixture was cooled to 25 °C, filtered through Celite, and concentrated in vacuo. The residue was purified by flash chromatography (SiO<sub>2</sub>, 15% EtOAc–hexanes) to yield **23** as a clear oil (12.7 mg, 49%): <sup>1</sup>H NMR (CDCl<sub>3</sub>, 500 MHz) δ 8.61–8.59 (m, 2H), 8.35 (s, 1H), 7.55–7.50 (m, 3H), 4.54 (q, *J* = 7.1 Hz, 2H), 1.68 (s, 9H), 1.49 (t, *J* = 7.1 Hz, 3H); <sup>13</sup>C NMR (CDCl<sub>3</sub>, 125 MHz) δ 166.0, 164.3, 162.8, 159.0, 157.8, 136.4, 131.8, 129.0 (2C), 128.8 (2C), 117.6, 84.0, 62.9, 28.2 (3C), 14.4; IR (neat) ν<sub>max</sub> 2981, 2930, 1746, 1727, 1555, 1458, 1377, 1279, 1256, 1216, 1187, 159, 1104, 1020, 845, 737, 694 cm<sup>-1</sup>; HRESI-TOF *m/z* 329.1497 (C<sub>18</sub>H<sub>20</sub>N<sub>2</sub>O<sub>4</sub> + H<sup>+</sup> requires 329.1496).

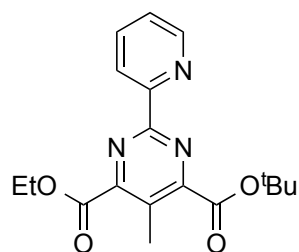

**4-(tert-Butyl)-6-Ethyl-5-Methyl-2-(pyridin-2-yl)pyrimidine-4,6-dicarboxylate (24).** A solution of **5a** (0.094 mmol, 25 mg) in anhydrous CH<sub>3</sub>CN (200 μL) at 25 °C was treated with a solution of free-based picolinimidamide (0.062 mmol, 7.5 mg) in anhydrous CH<sub>3</sub>CN (200 μL). The reaction mixture was stirred at 60 °C for 16 h, upon which time the mixture was cooled to 25 °C, filtered through Celite, and concentrated in vacuo. The residue was purified by flash chromatography (SiO<sub>2</sub>, 50% EtOAc–hexanes) to yield **24** as a clear oil (16.3 mg, 77%): <sup>1</sup>H NMR (CDCl<sub>3</sub>, 400 MHz) δ 8.84 (ddd, *J* = 0.9, 1.7, 5.0 Hz, 1H), 8.53 (dt, *J* = 1.0, 8.0 Hz, 1H), 7.85 (td, *J* = 1.8, 7.8 Hz, 1H), 7.40 (ddd, *J* = 1.2, 4.8, 7.6 Hz, 1H), 4.50 (q, *J* = 7.2 Hz, 2H), 2.53 (s, 3H), 1.66 (s, 9H), 1.44 (t, *J* = 7.1 Hz, 3H); <sup>13</sup>C NMR (CDCl<sub>3</sub>, 125 MHz) δ 165.1, 164.3, 161.1, 160.8, 159.1, 153.6, 150.2, 137.3, 125.3, 124.3, 84.6, 62.7, 53.6, 28.3 (3C), 14.4, 14.3; IR (neat)  $\nu_{\text{max}}$  2980, 2930, 1732, 1553, 1443, 1395, 1373, 1289, 1257, 1161, 1138, 1091, 1045, 844, 751 cm<sup>-1</sup>; HRESI-TOF *m/z* 344.1616 (C<sub>18</sub>H<sub>21</sub>N<sub>3</sub>O<sub>4</sub> + H<sup>+</sup> requires 344.1605).

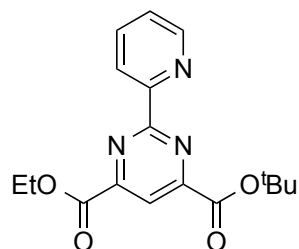

**4-(tert-Butyl) 6-Ethyl 2-(Pyridin-2-yl)pyrimidine-4,6-dicarboxylate (25).** A solution of **5b** (0.099 mmol, 25 mg) in anhydrous CH<sub>3</sub>CN (200 μL) at 25 °C was treated with a solution of free-based picolinimidamide (0.066 mmol, 8.0 mg) in anhydrous CH<sub>3</sub>CN (200 μL). The reaction mixture was stirred at 60 °C for 16 h, upon which time the mixture was cooled to 25 °C, filtered through Celite, and concentrated in vacuo. The residue was purified by flash chromatography (SiO<sub>2</sub>, 45% EtOAc–hexanes) to yield **25** as a clear oil (13.6 mg, 63%): <sup>1</sup>H NMR (CDCl<sub>3</sub>, 500 MHz) δ 8.90–8.84 (m, 1H), 8.63 (d, *J* = 7.9 Hz, 1H), 8.48 (s, 1H), 7.88 (tt, *J* = 5.2, 10.7 Hz, 1H), 7.47–7.41 (m, 1H), 4.55 (q, *J* = 7.2 Hz, 2H), 1.68 (s, 9H), 1.48 (t, *J* = 7.1 Hz, 3H); <sup>13</sup>C NMR (CDCl<sub>3</sub>, 125 MHz) δ 165.0, 164.1, 162.4, 159.4, 158.5, 153.6, 150.5, 137.2, 125.7, 124.7, 119.1, 84.3, 63.2, 28.1 (3C), 14.3; IR (neat)  $\nu_{\text{max}}$  2981, 2932, 1729, 1555, 1446, 1377, 1258, 1224, 1191, 1159, 1108, 1018, 842, 753, 676 cm<sup>-1</sup>; HRESI-TOF *m/z* 330.1454 (C<sub>17</sub>H<sub>19</sub>N<sub>3</sub>O<sub>4</sub> + H<sup>+</sup> requires 330.1448).

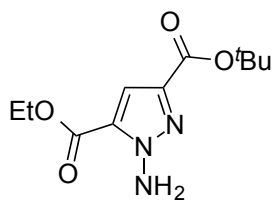

**3-(*tert*-Butyl) 5-Ethyl 1-Amino-1*H*-pyrazole-3,5-dicarboxylate (9b).** Following the *N*-amination procedure described in the formation of **9a**, compound **9b** was generated from **8b** (4.6 mmol, 1.1 g). The residue was purified by flash chromatography (SiO<sub>2</sub>, 20% EtOAc–hexanes) to yield **9b** as a mixture of regioisomers as a white amorphous solid (0.84 g, 72%). Isomer A: <sup>1</sup>H NMR (CDCl<sub>3</sub>, 600 MHz) δ 7.16 (s, 1H), 6.08 (bs, 2H), 4.36 (q, *J* = 7.1 Hz, 2H), 1.56 (s, 9H), 1.37 (t, *J* = 7.1 Hz, 3H); <sup>13</sup>C NMR (CDCl<sub>3</sub>, 150 MHz) δ 161.6, 159.3, 137.3, 128.6, 111.9, 83.9, 61.3, 28.3 (3C), 14.5. Isomer B: <sup>1</sup>H NMR (CDCl<sub>3</sub>, 600 MHz) δ 7.25 (s, 1H), 6.08 (bs, 2H), 4.36 (q, *J* = 7.1 Hz, 2H), 1.57 (s, 9H), 1.37 (t, *J* = 7.1 Hz, 3H); <sup>13</sup>C NMR (CDCl<sub>3</sub>, 150 MHz) δ 160.6, 160.1, 139.0, 127.6, 111.7, 82.1, 61.9, 28.3 (3C), 14.3; IR for mixture (film)  $\nu_{\max}$  3334, 3243, 2979, 2935, 1708, 1588, 1528, 1448, 1392, 1369, 1283, 1221, 1158, 1104, 1026, 845, 764, 721 cm<sup>-1</sup>; HRESI-TOF *m/z* 256.1285 (C<sub>11</sub>H<sub>17</sub>N<sub>3</sub>O<sub>4</sub> + H<sup>+</sup> requires 256.1292).

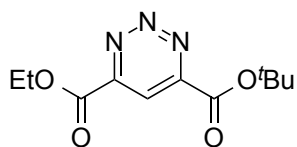

**4-(*tert*-Butyl) 6-Ethyl 1,2,3-Triazine-4,6-dicarboxylate (5b).** Compound **5b** was prepared from **9b** (0.78 mmol, 0.20 g) following the procedure used to prepare **5a**. The resulting residue was purified by flash chromatography (SiO<sub>2</sub>, 15% EtOAc–hexanes) to yield **5b** as a yellow oil (135 mg, 68%): <sup>1</sup>H NMR (CDCl<sub>3</sub>, 400 MHz) δ 8.46 (s, 1H), 4.60 (q, *J* = 7.1 Hz, 2H), 1.69 (s, 9H), 1.50 (t, *J* = 7.1 Hz, 3H); <sup>13</sup>C NMR (CDCl<sub>3</sub>, 100 MHz) δ 162.5, 161.1, 152.1, 151.0, 117.2, 85.8, 63.9, 28.1 (3C), 14.3; IR (film)  $\nu_{\max}$  2981, 2937, 1729, 1573, 1459, 1370, 1333, 1258, 1160, 1096, 1018, 955, 840, 799, 764, 721 cm<sup>-1</sup>; HRESI-TOF *m/z* 254.1135 (C<sub>11</sub>H<sub>15</sub>N<sub>3</sub>O<sub>4</sub> + H<sup>+</sup> requires 254.1135).

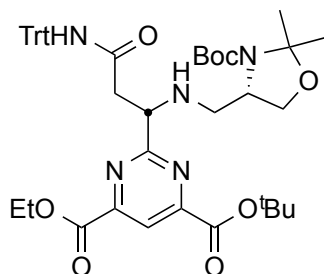

**4-(*tert*-Butyl) 6-Ethyl 2-((*S*)-1-(((*S*)-3-(*tert*-Butyloxycarbonyl)-2,2-dimethyloxazolidin-4-yl)methyl)amino)-3-oxo-3-(tritylamino)propyl)pyrimidine-4,6-dicarboxylate (26).** A solution of **13** (0.166 mmol, 100 mg) in MeOH (6 mL) was treated with glacial AcOH (0.34 mmol, 20 μL) followed by a spatula tip of Raney<sup>®</sup> 2800 Nickel as an aqueous cake. This suspension was stirred at 25 °C until complete consumption of the amidoxime was evident by TLC. The reaction was filtered through a Celite plug and concentrated in vacuo without

allowing the temperature of the sample to increase above 30 °C. The residue was redissolved in CH<sub>2</sub>Cl<sub>2</sub> and concentrated two additional times to remove residual MeOH. The resulting residue was treated with CH<sub>2</sub>Cl<sub>2</sub> (4 mL) followed by 1 N aqueous NaOH (4 mL). This mixture was shaken briefly before the organic layer was extracted, dried over Na<sub>2</sub>SO<sub>4</sub>, and concentrated in vacuo, without allowing the temperature of the sample to increase above 30 °C, to yield the free-based amidine **4** (82 mg, 84 %). The resulting residue was then briefly dried under high vacuum and used within 1 h.

**Inverse electron demand Diels–Alder reaction:** A solution of powdered 4 Å molecular sieves and 1,2,3-triazine **5b** (0.136 mmol, 35 mg) in anhydrous CH<sub>3</sub>CN (280 μL) at 25 °C was treated with a solution of crude amidine **4** (0.068 mmol, 40 mg) in anhydrous CH<sub>3</sub>CN (175 μL) dropwise. This mixture was stirred at 25 °C for 12 h at which time the reaction mixture was filtered through Celite and concentrated in vacuo. The resulting residue was dissolved in CH<sub>2</sub>Cl<sub>2</sub> and purified by flash chromatography (SiO<sub>2</sub>) using a gradient elution of 30% EtOAc–hexanes to elute unreacted 1,2,3-triazine **5b** and then 60% EtOAc–hexanes to yield **26** (41 mg, 76%):  $[\alpha]_D^{23} +0.40$  (*c* 1.00, CHCl<sub>3</sub>); <sup>1</sup>H NMR (CD<sub>3</sub>CN, 500 MHz, 60 °C) δ 8.71 (s, 1H), 8.23 (s, 1H), 7.35–7.07 (m, 15H), 4.45 (q, *J* = 7.1 Hz, 2H), 4.32 (dd, *J* = 4.9, 7.6 Hz, 1H), 3.80–3.65 (m, 3H), 2.81 (dd, *J* = 7.7, 15.4 Hz, 2H), 2.74 (dd, *J* = 5.0, 15.4 Hz, 1H), 2.65 (dd, *J* = 8.6, 11.6 Hz, 1H), 1.62 (s, 9H), 1.44 (s, 3H), 1.39 (m, 15H); IR (film)  $\nu_{\max}$  2979, 2930, 1689, 1551, 1492, 1391, 1257, 1155, 1086, 1021, 843, 803, 738, 700 cm<sup>-1</sup>; HRESI-TOF *m/z* 794.4115 (C<sub>45</sub>H<sub>55</sub>N<sub>5</sub>O<sub>8</sub> + H<sup>+</sup>, requires 794.4123).

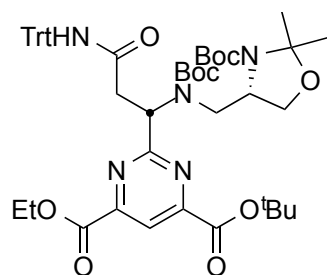

**4-(tert-Butyl) 6-Ethyl 2-((S)-1-((tert-Butyloxycarbonyl)((S)-3-(tert-butyloxycarbonyl)-2,2-dimethylazolidin-4-yl)methyl)amino)-3-oxo-3-(tritylamino)propyl)pyrimidine-4,6-dicarboxylate (**27**).** A solution of **26** (0.026 mmol, 21 mg) in anhydrous THF was treated with Et<sub>3</sub>N (0.104 mmol, 10.5 mg) followed by Boc<sub>2</sub>O (0.091 mmol, 20 mg) at 25 °C. The reaction mixture was warmed at 50 °C and stirred for 12 h, upon which complete conversion was noted by TLC. The reaction mixture was concentrated, redissolved in CHCl<sub>3</sub> and purified by PTLC (SiO<sub>2</sub>, 30% EtOAc–hexanes). Product **27** was isolated as a white film (20 mg, 87%):  $[\alpha]_D^{23} -25$  (*c* 1.00, CHCl<sub>3</sub>); <sup>1</sup>H NMR (CD<sub>3</sub>CN, 500 MHz, 60 °C) δ 8.23 (s, 1H), 7.33–7.18 (m, 15H), 5.25–4.96 (m, 1H), 4.51–4.34 (m, 2H), 4.23 (bs, 1H), 4.18 (d, *J* = 9.1 Hz, 1H), 4.00 (bs, 1H), 3.79 (bs, 1H), 3.60 (bs, 1H), 3.11 (m, 2H), 1.60 (s, 9H), 1.55 (s, 3H), 1.45 (s, 3H), 1.45–1.15 (m, 18H), 1.38 (t, *J* = 7.1 Hz, 3H); IR (film)  $\nu_{\max}$  2979, 1687, 1556, 1490, 1423, 1392, 1257, 1159, 1081, 1021, 847, 753, 700 cm<sup>-1</sup>; HRESI-TOF *m/z* 894.4644 (C<sub>50</sub>H<sub>63</sub>N<sub>5</sub>O<sub>10</sub> + H<sup>+</sup> requires 894.4647).



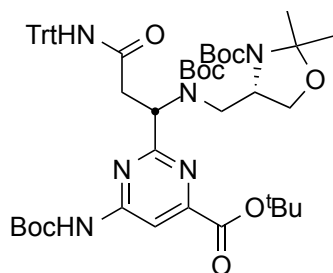

***tert*-Butyl-(*S*)-4-(((*tert*-Butyloxycarbonyl)((*S*)-1-(4-(*tert*-butyloxycarbonyl)-6-((*tert*-butyloxycarbonyl)amino)pyrimidin-2-yl)-3-oxo-3-(tritylamino)propyl)amino)methyl)-2,2-dimethyloxazolidine-3-carboxylate (**28**). A solution of **27** (0.017 mmol, 15 mg) in THF:<sup>t</sup>BuOH (400  $\mu$ L, 3:1) was treated with 1 N aqueous NaOH (17  $\mu$ L) dropwise at 25  $^{\circ}$ C. After 12 h, complete conversion was observed by TLC. The reaction was quenched with the addition of 1 N aqueous HCl to a pH < 4 and the product was extracted with CH<sub>2</sub>Cl<sub>2</sub>. The organic layer was concentrated and lyophilized. The residue was redissolved in anhydrous <sup>t</sup>BuOH (500  $\mu$ L), to which Et<sub>3</sub>N (0.025 mmol, 3.6  $\mu$ L) and DPPA (0.023 mmol, 5.0  $\mu$ L) were added at 25  $^{\circ}$ C. The reaction mixture was warmed at reflux and monitored by TLC. After 12 h, complete conversion was noted and the reaction mixture was concentrated. The residue was redissolved in CH<sub>2</sub>Cl<sub>2</sub> and purified by flash chromatography (SiO<sub>2</sub>, 30% EtOAc–hexanes) to provide **28** as a white amorphous solid (9.8 mg, 82% for 2-steps):  $[\alpha]_D^{23}$  –19 (*c* 0.83, CHCl<sub>3</sub>); <sup>1</sup>H NMR (CD<sub>3</sub>CN, 500 MHz, 60  $^{\circ}$ C)  $\delta$  8.18 (s, 1H), 7.99 (s, 1H), 7.38–7.13 (m, 16H), 5.16–4.68 (m, 1H), 4.30–4.06 (m, 2H), 3.98–3.85 (m, 1H), 3.80–3.66 (m, 1H), 3.55–3.44 (m, 1H), 3.11–2.97 (m, 2H), 1.57 (s, 9H), 1.55 (s, 9H), 1.48–1.09 (m, 24H); IR (film)  $\nu_{\max}$  2978, 2932, 1740, 1693, 1566, 1493, 1391, 1368, 1326, 1244, 1159, 1102, 1078, 848, 768, 701 cm<sup>-1</sup>; HRESI-TOF *m/z* 937.5061 (C<sub>52</sub>H<sub>68</sub>N<sub>6</sub>O<sub>10</sub> + H<sup>+</sup> requires 937.5069).**

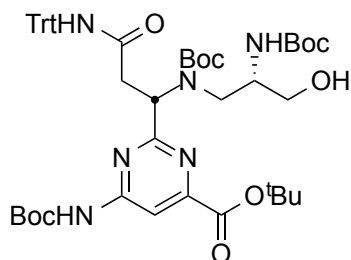

***tert*-Butyl 2-((*5S,8S*)-6-(*tert*-Butoxycarbonyl)-8-(hydroxymethyl)-12,12-dimethyl-3,10-dioxo-1,1,1-triphenyl-11-oxa-2,6,9-triazatridecan-5-yl)-6-((*tert*-butoxycarbonyl)amino)pyrimidine-4-carboxylate (**29**). Compound **28** (0.0096 mmol, 9.0 mg) was dissolved in MeOH (200  $\mu$ L) and *p*-TsOH monohydrate (0.0048 mmol, 1.0 mg) was added in one portion at 25  $^{\circ}$ C. The reaction mixture was stirred at 25  $^{\circ}$ C for 3 h, upon which time complete conversion was noted by TLC. The reaction was quenched with the addition saturated aqueous NaHCO<sub>3</sub> and extracted with EtOAc. The organic phases were combined, washed with saturated aqueous NaCl, dried over anhydrous Na<sub>2</sub>SO<sub>4</sub> and concentrated. The residue was purified by PTLC (SiO<sub>2</sub>, 40% EtOAc–hexanes) to yield **29** as a film (7.3 mg, 85%):  $[\alpha]_D^{23}$  –36 (*c* 0.64, CHCl<sub>3</sub>); <sup>1</sup>H NMR (CD<sub>3</sub>CN, 500 MHz, 60  $^{\circ}$ C)  $\delta$  8.22 (s, 1H), 7.42 (s, 1H), 7.29–7.21 (m, 15H), 5.64 (bs, 1H), 4.95–4.86 (m, 1H), 3.93–3.82 (m, 1H), 3.68–3.49 (m, 4H), 3.21–3.10 (m, 1H), 2.99–2.83 (m, 1H), 1.56 (s, 9H), 1.55 (s, 9H), 1.40 (s, 9H), 1.35–1.08 (m, 9H); IR (film)**

$\nu_{\max}$  2978, 2930, 1739, 1691, 1569, 1496, 1456, 1394, 1368, 1327, 1248, 1159, 774, 700  $\text{cm}^{-1}$ ;  
HRESI-TOF  $m/z$  897.4751 ( $\text{C}_{49}\text{H}_{64}\text{N}_6\text{O}_{10} + \text{H}^+$  requires 897.4756).

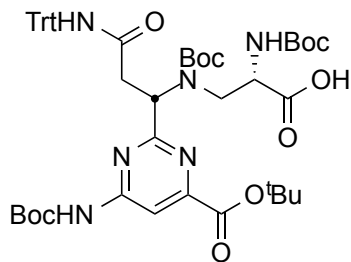

**(S)-3-((tert-Butyloxycarbonyl)((S)-1-(4-(tert-butyloxycarbonyl)-6-((tert-butyloxycarbonyl)-amino)pyrimidin-2-yl)-3-oxo-3-(tritylamino)propyl)amino)-2-((tert-butyloxycarbonyl)-amino)propanoic Acid (30).** A solution of **29** (0.0055 mmol, 5.0 mg) in acetone (200  $\mu\text{L}$ ) cooled to 0  $^{\circ}\text{C}$  was treated with a solution of 2.5 M Jones' reagent (6.5  $\mu\text{L}$ ). The reaction mixture was stirred at 0  $^{\circ}\text{C}$  for 1 h, upon which time complete conversion was noted by TLC. Isopropanol (100  $\mu\text{L}$ ) was added dropwise to quench the reaction. Concentration under a stream of nitrogen provided a residue that was redissolved in a mixture of  $\text{H}_2\text{O}$  and EtOAc. The organic layer was collected, dried over anhydrous  $\text{Na}_2\text{SO}_4$ , filtered and concentrated. The resulting residue was purified by PTLC ( $\text{SiO}_2$ , 50% EtOAc–hexanes containing 1–2% AcOH). The carboxylic acid **30** was isolated as a white amorphous solid (4.9 mg, 98%):  $[\alpha]_{\text{D}}^{23} -15$  ( $c$  0.49,  $\text{CHCl}_3$ );  $^1\text{H}$  NMR ( $\text{CD}_3\text{CN}$ , 500 MHz, 60  $^{\circ}\text{C}$ )  $\delta$  8.24 (s, 1H), 7.49 (s, 1H), 7.30–7.20 (m, 15H), 5.02–4.84 (m, 1H), 4.44–4.34 (m, 1H), 3.90–3.79 (m, 1H), 3.60–3.47 (m, 1H), 3.47–3.28 (m, 1H), 3.06–2.89 (m, 1H), 1.57 (s, 9H), 1.55 (s, 9H), 1.39 (s, 9H), 1.35–1.13 (m, 9H); IR (film)  $\nu_{\max}$  2974, 2928, 2855, 1737, 1692, 1568, 1511, 1493, 1451, 1393, 1367, 1245, 1153, 1097, 1024, 994, 841, 799, 767, 735, 699  $\text{cm}^{-1}$ ; HRESI-TOF  $m/z$  911.4549 ( $\text{C}_{49}\text{H}_{62}\text{N}_6\text{O}_{11} + \text{H}^+$  requires 911.4549).

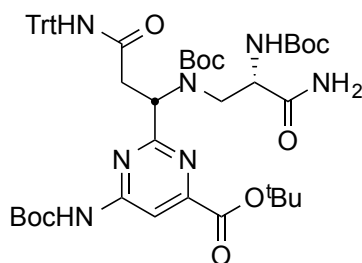

**tert-Butyl-2-((5S,8S)-6-(tert-Butyloxycarbonyl)-8-carbamoyl-12,12-dimethyl-3,10-dioxo-1,1,1-triphenyl-11-oxa-2,6,9-triazatridecan-5-yl)-6-((tert-butyloxycarbonyl)amino)-pyrimidine-4-carboxylate (31).** A solution of **30** (0.0065 mmol, 6.0 mg) and HOBT (0.0078 mmol, 1.1 mg) in anhydrous  $\text{CH}_2\text{Cl}_2$  (175  $\mu\text{L}$ ) at 0  $^{\circ}\text{C}$  was treated with EDCI (0.0078 mmol, 1.5 mg). Upon complete addition of EDCI, the reaction mixture was warmed to 25  $^{\circ}\text{C}$  and stirred for 30 min, before being re-cooled to 0  $^{\circ}\text{C}$  and addition of 0.5 M  $\text{NH}_3$  in THF (52  $\mu\text{L}$ ). Precipitation formed as a consequence of the addition. The reaction mixture was warmed to 25  $^{\circ}\text{C}$  and stirred for 30 min, upon which time complete conversion was noted by TLC. The reaction mixture was loaded directly onto a PTLC plate ( $\text{SiO}_2$ ) and purified using 5% MeOH– $\text{CH}_2\text{Cl}_2$  as the eluent. Compound **31** was isolated as a white film (5.5 mg, 93%):  $[\alpha]_{\text{D}}^{23} -20$  ( $c$  0.37,  $\text{CHCl}_3$ );  $^1\text{H}$  NMR ( $\text{CD}_3\text{CN}$ , 500 MHz, 60  $^{\circ}\text{C}$ )  $\delta$  8.25 (s, 1H), 7.41 (s, 1H), 7.32–7.20 (m,

15H), 5.00–4.80 (m, 1H), 4.38–4.29 (m, 1H), 3.90–3.79 (m, 1H), 3.62–3.49 (m, 1H), 3.44–3.25 (m, 1H), 3.04–2.82 (m, 1H), 1.58 (s, 9H), 1.55 (s, 9H), 1.41 (s, 9H), 1.37–1.09 (m, 9H); IR (film)  $\nu_{\max}$  2963, 2927, 2855, 1738, 1663, 1567, 1493, 1455, 1393, 1366, 1258, 1151, 1090, 1019, 868, 798, 769, 736, 699  $\text{cm}^{-1}$ ; HRESI-TOF  $m/z$  910.4704 ( $\text{C}_{49}\text{H}_{63}\text{N}_7\text{O}_{10} + \text{H}^+$  requires 910.4709).

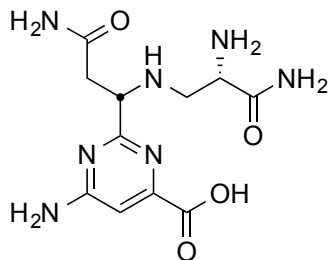

**6-Amino-2-(((S)-3-Amino-1-(((S)-2,3-diamino-3-oxopropyl)amino)-3-oxopropyl)pyrimidine-4-carboxylic Acid (32).** Compound **31** (0.005 mmol, 4.5 mg) was dissolved in TFA: $\text{CH}_2\text{Cl}_2$  (400  $\mu\text{L}$ , 3:1). This reaction mixture was stirred at room temperature and monitored by LC/MS. After 16 h, complete conversion to the desired product was observed. The reaction was quenched by dropwise addition of MeOH and concentrated under a nitrogen stream. The resulting residue was redissolved in  $\text{H}_2\text{O}$  and flushed through a pipette column (C18, 100%  $\text{H}_2\text{O}$ ) to yield the TFA salt of **32**. The isolated residue was treated with 1 N aqueous HCl to provide the desired HCl salt of **32** as a white amorphous solid (1.3 mg, 87%):  $[\alpha]_{\text{D}}^{23} -28$  ( $c$  0.16,  $\text{H}_2\text{O}$ ); lit<sup>2</sup>  $[\alpha]_{\text{D}}^{25} -23$  ( $c$  0.065,  $\text{H}_2\text{O}$ );  $^1\text{H}$  NMR ( $\text{CD}_3\text{CN}$ , 600 MHz)  $\delta$  7.09 (s, 1H), 4.35 (dd,  $J = 5.3, 7.7$  Hz, 1H), 4.19 (dd,  $J = 4.9, 6.6$  Hz, 1H), 3.27 (dd,  $J = 4.8, 13.7$  Hz, 1H), 3.19–3.15 (m, 1H), 2.94 (dd,  $J = 5.4, 16.0$  Hz, 1H), 2.86 (dd,  $J = 7.7, 16.0$  Hz, 1H); IR (neat)  $\nu_{\max}$  3442, 3236, 1700, 1678, 1498, 1152, 1062, 819  $\text{cm}^{-1}$ ; HRESI-TOF  $m/z$  312.1415 ( $\text{C}_{11}\text{H}_{17}\text{N}_7\text{O}_4 + \text{H}^+$  requires 312.1415).

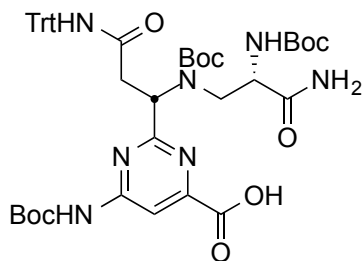

**2-(((5S,8S)-6-(tert-Butyloxycarbonyl)-8-carbamoyl-12,12-dimethyl-3,10-dioxo-1,1,1-triphenyl-11-oxa-2,6,9-triazatridecan-5-yl)-6-((tert-butyloxycarbonyl)amino)pyrimidine-4-carboxylic Acid (33).** A solution of **31** (0.0087 mmol, 8.0 mg) in THF:MeOH (220  $\mu\text{L}$ , 3:1) was treated with 1 N aqueous NaOH (17.4  $\mu\text{L}$ ) at 25  $^\circ\text{C}$ . After 4 h, complete conversion was noted by TLC. The reaction was quenched with addition of 1 N aqueous HCl and the product was extracted with  $\text{CH}_2\text{Cl}_2$ . The organic layer was dried over  $\text{Na}_2\text{SO}_4$ , filtered, and concentrated in vacuo to provide pure **33** as a white amorphous solid (7.2 mg, 97%):  $[\alpha]_{\text{D}}^{23} -31$  ( $c$  0.26,  $\text{CHCl}_3$ );  $^1\text{H}$  NMR ( $\text{CD}_3\text{CN}$ , 500 MHz, 60  $^\circ\text{C}$ )  $\delta$  8.36 (bs, 1H), 7.46 (bs, 1H), 7.30–7.22 (m, 15H), 5.66 (bs, 1H), 4.99 (bs, 1H), 4.33 (bs, 1H), 3.84–3.80 (m, 1H), 3.52 (bs, 1H), 2.98 (bs, 1H), 1.55 (s, 9H), 1.42 (s, 9H), 1.30 (bs, 9H); IR (film)  $\nu_{\max}$  2971, 2927, 1740, 1686, 1570, 1507, 1494, 1448, 1420, 1367, 1329, 1232, 1156, 701  $\text{cm}^{-1}$ ; HRESI-TOF  $m/z$  854.4082 ( $\text{C}_{45}\text{H}_{55}\text{N}_7\text{O}_{10} + \text{H}^+$  requires 854.4083).

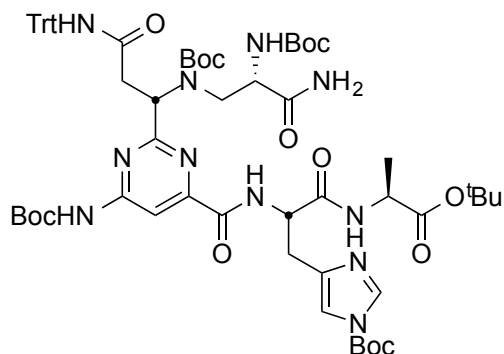

***tert*-Butyl-4-((*S*)-3-(((*S*)-1-(*tert*-Butyloxy)-1-oxopropan-2-yl)amino)-2-(2-((*5S,8S*)-6-(*tert*-butoxycarbonyl)-8-carbamoyl-12,12-dimethyl-3,10-dioxo-1,1,1-triphenyl-11-oxa-2,6,9-triazatridecan-5-yl)-6-((*tert*-butoxycarbonyl)amino)pyrimidine-4-carboxamido)-3-oxopropyl)-1*H*-imidazole-1-carboxylate (**34**). A solution of **33** (0.004 mmol, 3.5 mg) in DMF (75  $\mu$ L) was treated with a solution of N<sup>(*tm*)</sup>-Boc-L-His-L-Ala-O<sup>*t*</sup>Bu (0.008 mmol, 3.0 mg) in DMF (25  $\mu$ L), HOBt monohydrate (0.0044 mmol, 0.6 mg), and EDCI (0.0044 mmol, 0.8 mg) at room temperature. The mixture was stirred for 20 h and then concentrated under a nitrogen stream. The resulting residue was redissolved in CH<sub>2</sub>Cl<sub>2</sub> and rinsed with 1 N aqueous HCl. The organic layer was dried over Na<sub>2</sub>SO<sub>4</sub>, filtered, and concentrated in vacuo. The residue was purified by PTLC (SiO<sub>2</sub>, 3% MeOH-CH<sub>2</sub>Cl<sub>2</sub>). Compound **34** was isolated as a white amorphous solid (4.0 mg, 89%):  $[\alpha]_{\text{D}}^{23} -11$  (*c* 0.27, CHCl<sub>3</sub>); <sup>1</sup>H NMR (CD<sub>3</sub>CN, 500 MHz, 60 °C)  $\delta$  9.65 (s, 1H), 8.57 (s, 1H), 8.41 (s, 1H), 7.47–7.36 (m, 15H), 5.81 (bs, 1H), 5.56 (t, *J* = 4.6 Hz, 1H), 4.84–4.80 (m, 1H), 4.48–4.42 (m, 1H), 4.25–4.15 (m, 1H), 4.06–3.93 (m, 1H), 3.83–3.63 (m, 1H), 3.17–3.05 (m, 2H), 2.53–2.40 (m, 1H), 1.79 (s, 9H), 1.74 (s, 9H), 1.59 (s, 9H), 1.49 (bs, 9H), 1.34 (d, *J* = 7.1 Hz, 3H); IR (film)  $\nu_{\text{max}}$  2927, 1691, 1508, 1394, 1251, 1154, 717, 686, 672 cm<sup>-1</sup>; HRESI-TOF *m/z* 1218.6191 (C<sub>63</sub>H<sub>83</sub>N<sub>11</sub>O<sub>14</sub> + H<sup>+</sup> requires 1218.6193).**

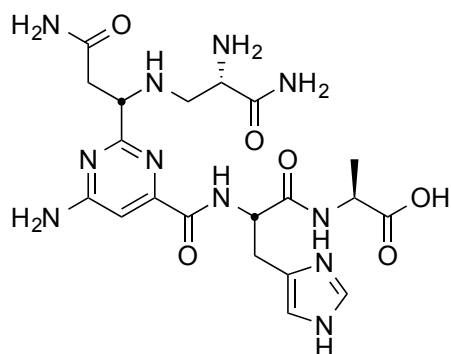

**(6-Amino-2-((*S*)-3-amino-1-(((*S*)-2,3-diamino-3-oxopropyl)amino)-3-oxopropyl)pyrimidine-4-carbonyl)-L-histidyl-L-alanine (**P-3A**, **3**). Compound **34** (0.003 mmol, 3.5 mg) was treated with 1.2 mL TFA:CH<sub>2</sub>Cl<sub>2</sub> (3:1) and stirred at room temperature. After 5 h, the reaction mixture was concentrated under a nitrogen stream. The residue was redissolved in H<sub>2</sub>O and passed through a C18 pipette column. The fractions containing product were lyophilized to provide the TFA salt of **3**. The residue was redissolved in 1 N aqueous HCl and lyophilized to provide **3** as the HCl salt (2.0 mg, quant.): <sup>1</sup>H NMR (D<sub>2</sub>O, 600 MHz)  $\delta$  8.61 (s, 1H), 7.33 (s, 1H), 7.08 (s, 1H), 4.90 (t, *J* = 7.3 Hz, 1H), 4.67 (t, *J* = 6.1 Hz, 1H), 4.49 (t, *J* = 5.4 Hz, 1H), 4.39 (q, *J* = 7.3**

<sup>2</sup>Boger, D.L.; Honda, T.; Menezes, R.F.; Colletti, S.L.; Dang, Q.; Yang, W. *J. Am. Chem. Soc.* **1994**, *116*, 82.

Hz, 1H), 3.71 (dd,  $J = 5.2, 14.0$  Hz, 1H), 3.61 (dd,  $J = 5.7, 14.0$  Hz, 1H), 3.41 (dd,  $J = 7.1, 15.4$  Hz, 1H), 3.32 (dd,  $J = 7.6, 15.3$  Hz, 1H), 3.14 (dd,  $J = 5.3, 16.7$  Hz, 1H), 3.08 (dd,  $J = 7.0, 16.6$  Hz, 1H), 1.40 (d,  $J = 7.4$  Hz, 3H);  $^{13}\text{C}$  NMR ( $\text{D}_2\text{O}$ , 125 MHz)  $\delta$  178.6, 176.2, 173.4, 170.8, 167.5, 166.8, 164.5, 155.6, 136.0, 130.4, 120.0, 106.3, 62.1, 55.0, 52.6, 51.3, 48.8, 38.2, 29.3, 18.5; IR (neat)  $\nu_{\text{max}}$  3307, 3188, 1684, 1654, 1634, 1559, 1538, 1517, 1457, 1414, 1359, 1265, 1162, 1098  $\text{cm}^{-1}$ ; HRESI-TOF  $m/z$  520.2371 ( $\text{C}_{20}\text{H}_{29}\text{N}_{11}\text{O}_6 + \text{H}^+$  requires 520.2375).

### $^1\text{H}$ NMR Comparison

| <b>Synthetic P-3A</b><br>(600 MHz, $\text{D}_2\text{O}$ ) | <b>Authentic P-3A<sup>2</sup></b><br>(400 MHz, $\text{D}_2\text{O}$ ) |
|-----------------------------------------------------------|-----------------------------------------------------------------------|
| 8.61 (s, 1H)                                              | 8.60 (s, 1H)                                                          |
| 7.33 (s, 1H)                                              | 7.32 (s, 1H)                                                          |
| 7.08 (s, 1H)                                              | 7.07 (s, 1H)                                                          |
| 4.90 (t, $J = 7.3$ Hz, 1H)                                | 4.90 (t, $J = 7.3$ Hz, 1H)                                            |
| 4.67 (t, $J = 6.1$ Hz, 1H)                                | 4.64 (t, $J = 6.7$ Hz, 1H)                                            |
| 4.49 (t, $J = 5.4$ Hz, 1H)                                | 4.49 (t, $J = 5.5$ Hz, 1H)                                            |
| 4.39 (q, $J = 7.3$ Hz, 1H)                                | 4.37 (q, $J = 7.4$ Hz, 1H)                                            |
| 3.71 (dd, $J = 5.2, 14.0$ Hz, 1H)                         | 3.71 (dd, $J = 5.2, 14.0$ Hz, 1H)                                     |
| 3.61 (dd, $J = 5.7, 14.0$ Hz, 1H)                         | 3.58 (dd, $J = 5.8, 14.0$ Hz, 1H)                                     |
| 3.41 (dd, $J = 7.1, 15.4$ Hz, 1H)                         | 3.41 (dd, $J = 6.8, 14.0$ Hz, 1H)                                     |
| 3.32 (dd, $J = 7.6, 15.3$ Hz, 1H)                         | 3.32 (dd, $J = 7.6, 14.0$ Hz, 1H)                                     |
| 3.14 (dd, $J = 5.3, 16.7$ Hz, 1H)                         | 3.10 (dd, $J = 7.0, 14.0$ Hz, 1H)                                     |
| 3.08 (dd, $J = 7.0, 16.6$ Hz, 1H)                         | 3.06 (dd, $J = 5.5, 14.0$ Hz, 1H)                                     |
| 1.40 (d, $J = 7.4$ Hz, 3H)                                | 1.41 (d, $J = 7.2$ Hz, 3H)                                            |

### $^{13}\text{C}$ NMR Comparison

| <b>Synthetic P-3A</b><br>(150 MHz, $\text{D}_2\text{O}$ ) | <b>Authentic P-3A<sup>2</sup></b><br>(100 MHz, $\text{D}_2\text{O}$ ) |
|-----------------------------------------------------------|-----------------------------------------------------------------------|
| 178.6                                                     | 178.8                                                                 |
| 176.2                                                     | 176.3                                                                 |
| 173.4                                                     | 173.4                                                                 |
| 170.8                                                     | 170.9                                                                 |
| 167.5                                                     | 167.6                                                                 |
| 166.8                                                     | 166.8                                                                 |
| 164.5                                                     | 164.8                                                                 |
| 155.6                                                     | 155.6                                                                 |
| 136.0                                                     | 136.0                                                                 |
| 130.4                                                     | 130.5                                                                 |
| 120.0                                                     | 120.0                                                                 |
| 106.3                                                     | 106.2                                                                 |
| 62.1                                                      | 62.1                                                                  |
| 55.0                                                      | 55.1                                                                  |
| 52.6                                                      | 52.7                                                                  |
| 51.3                                                      | 51.6                                                                  |
| 48.8                                                      | 48.8                                                                  |
| 38.2                                                      | 38.4                                                                  |
| 29.3                                                      | 29.3                                                                  |
| 18.5                                                      | 18.5                                                                  |

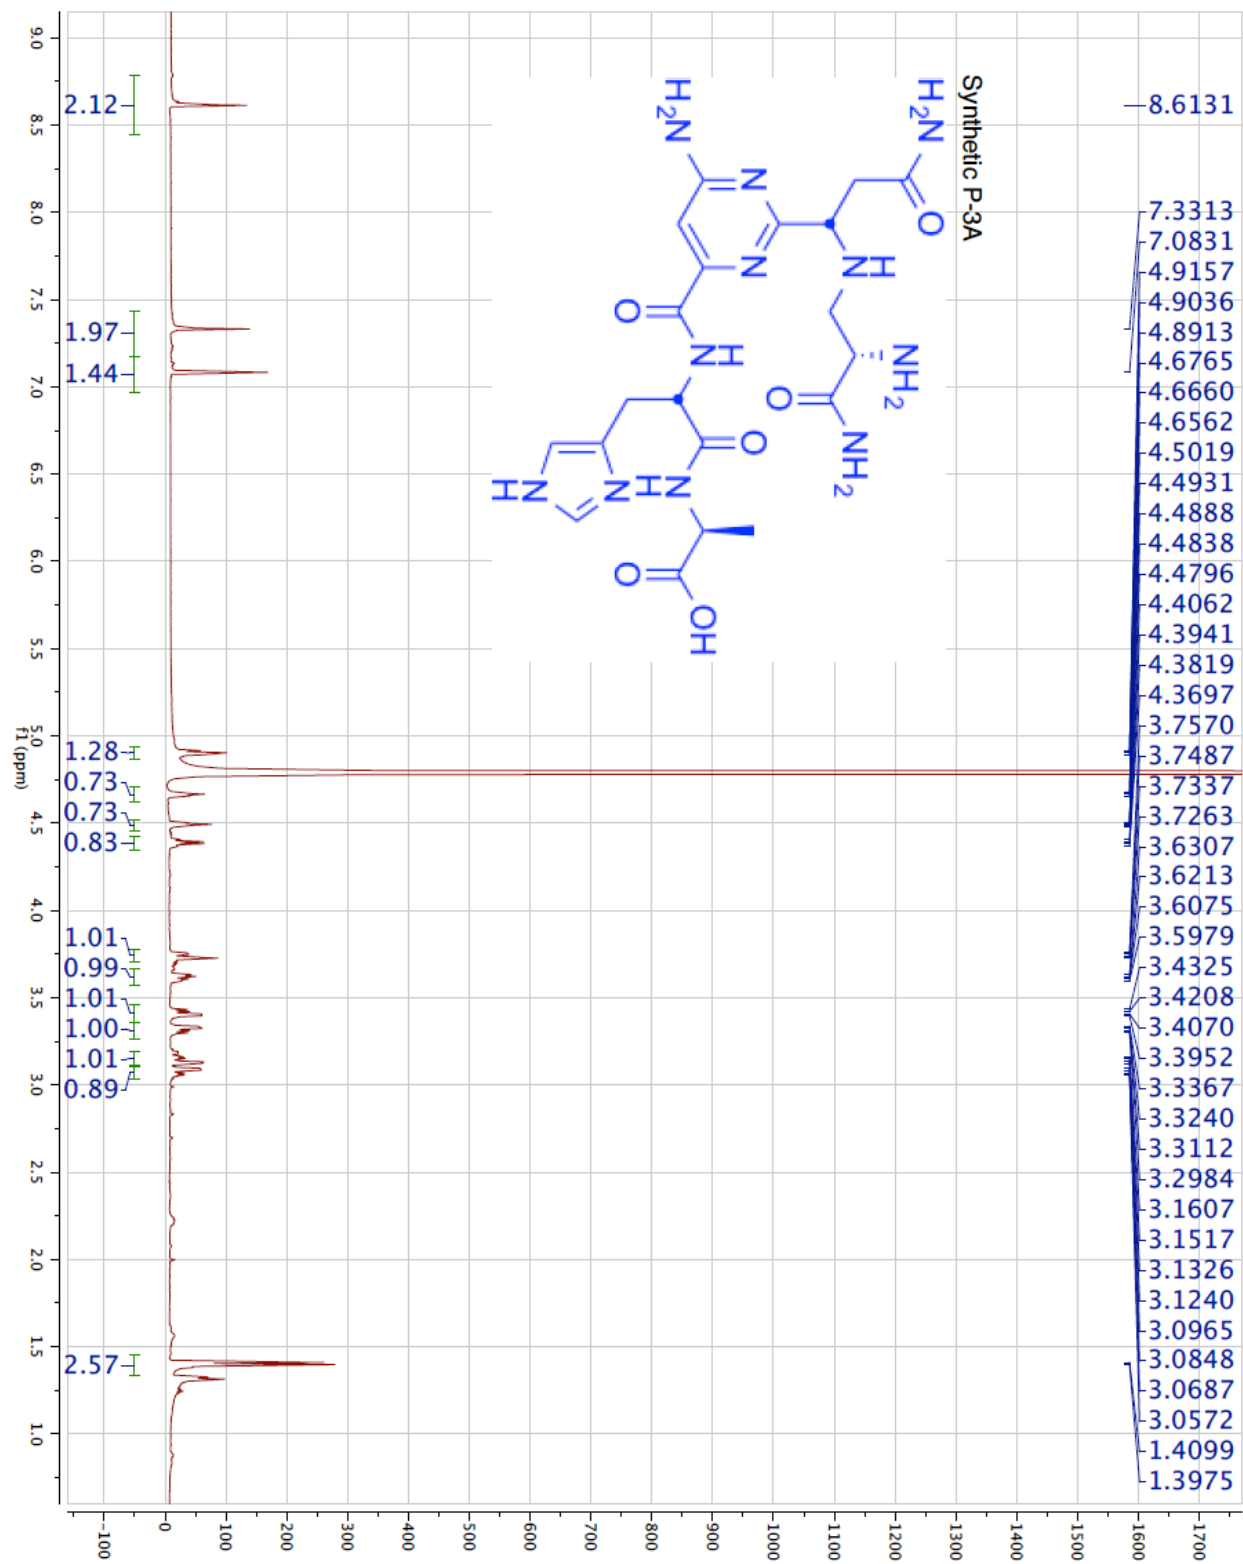

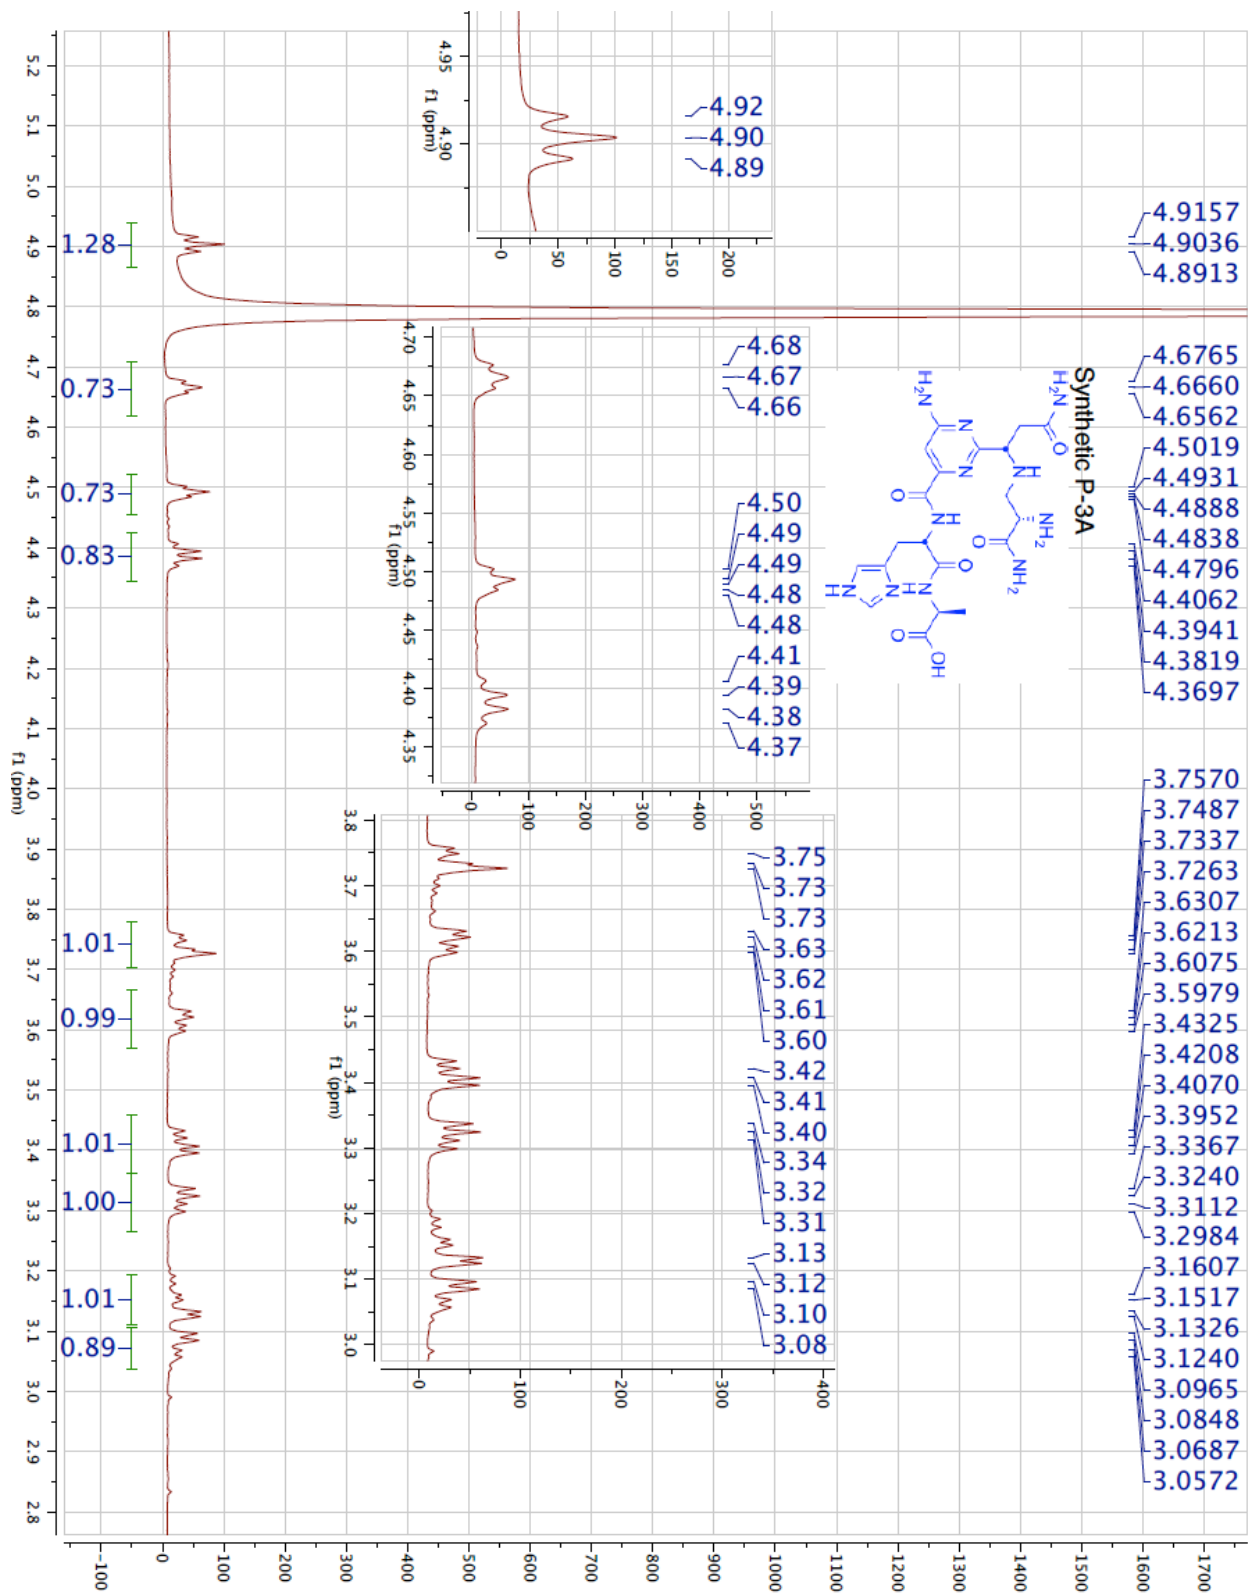

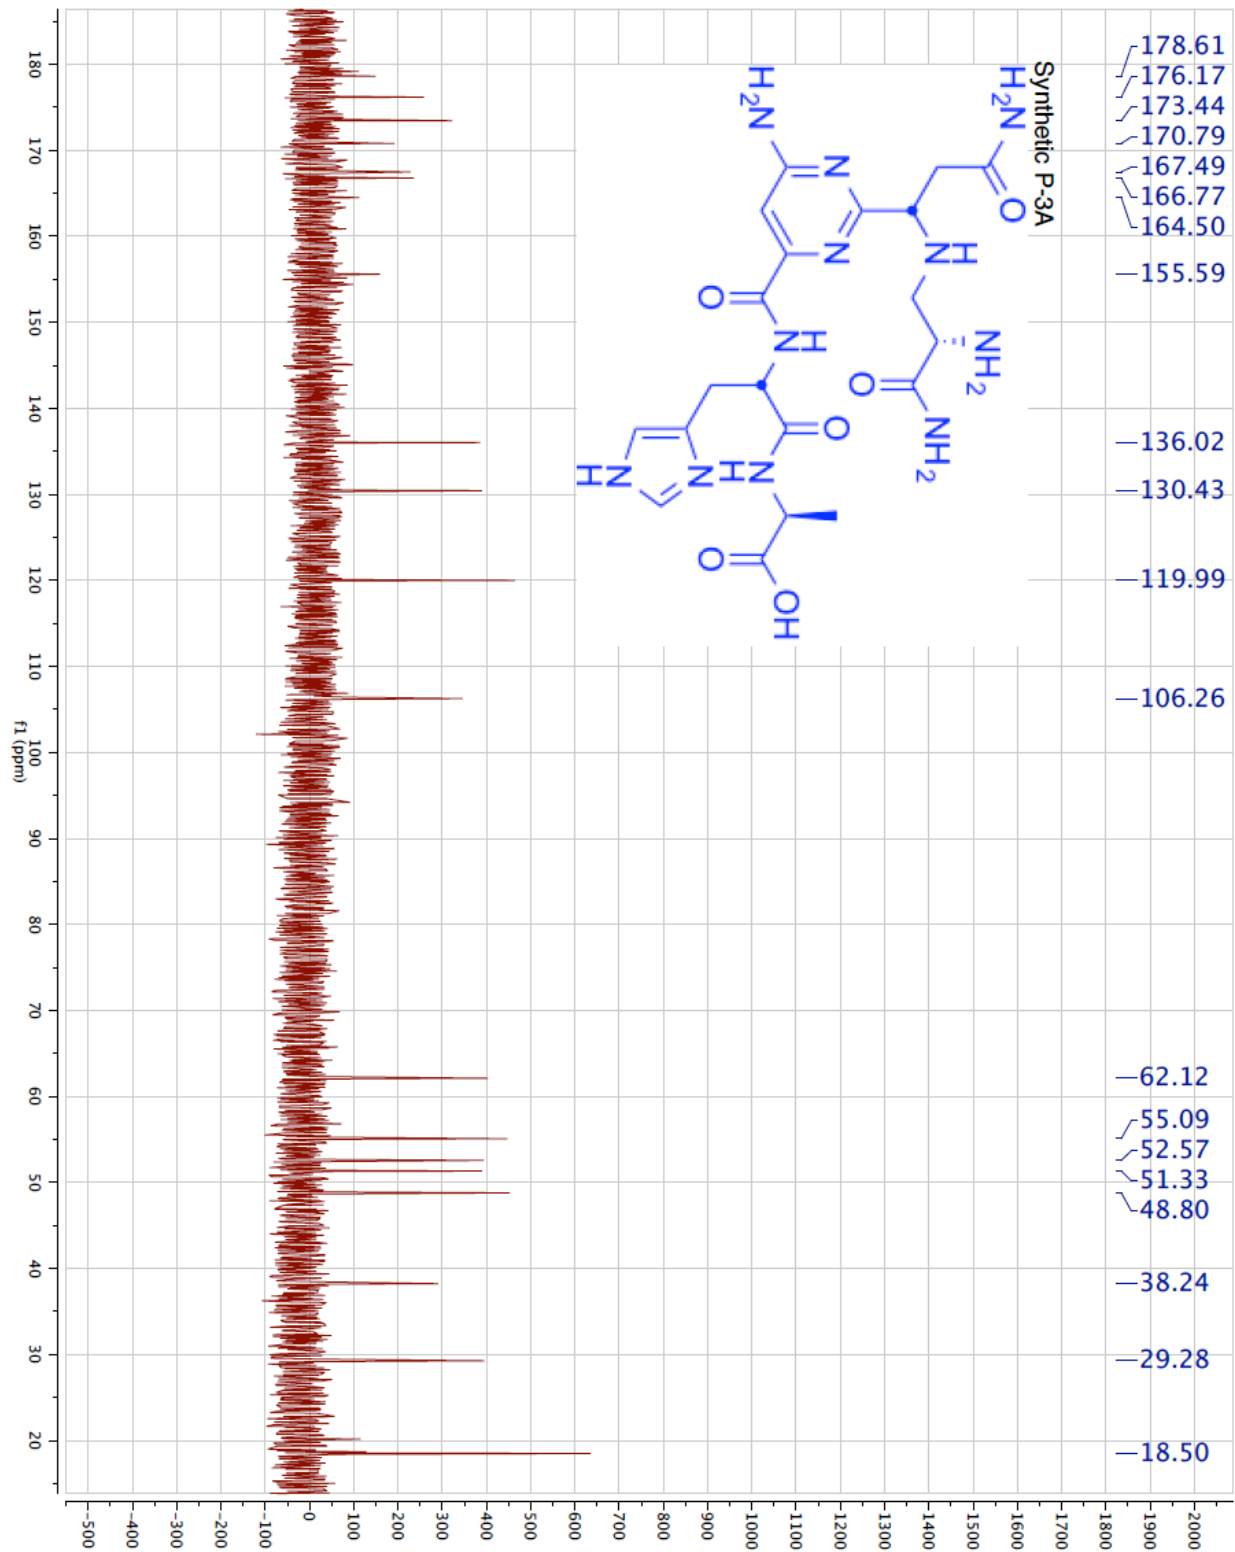

Supplement: NIHMS557667-supplement-Supplemental_Information.pdf [file NIHMS557667-supplement-Supplemental_Information.pdf]
